# Supplementary material for: Cross-sectional study of the association between serum perfluorinated alkyl acid concentrations and dental caries among US adolescents (NHANES 1999–2012)
Source: PubMed Central journal article supplement — BMJ Open. 2019 Feb 5;9(2):e024189. doi: 10.1136/bmjopen-2018-024189 (PMC6377528; doi:10.1136/bmjopen-2018-024189), 2019-02-05
Supplement: bmjopen-2018-024189.draft_revisions.pdf [file bmjopen-2018-024189.draft_revisions.pdf]

# BMJ Open

BMJ Open is committed to open peer review. As part of this commitment we make the peer review history of every article we publish publicly available.

When an article is published we post the peer reviewers' comments and the authors' responses online. We also post the versions of the paper that were used during peer review. These are the versions that the peer review comments apply to.

The versions of the paper that follow are the versions that were submitted during the peer review process. They are not the versions of record or the final published versions. They should not be cited or distributed as the published version of this manuscript.

BMJ Open is an open access journal and the full, final, typeset and author-corrected version of record of the manuscript is available on our site with no access controls, subscription charges or pay-per-view fees (<http://bmjopen.bmj.com>).

If you have any questions on BMJ Open's open peer review process please email [info.bmjopen@bmj.com](mailto:info.bmjopen@bmj.com)

# BMJ Open

## The Association between Serum Perfluoroalkyl Substance concentrations and Dental Caries Amongst US Children and Adolescents Aged 12 to 19 years. (NHANES 1999-2012)

|                               |                                                                                                                                                                                                                                                                                                                               |
|-------------------------------|-------------------------------------------------------------------------------------------------------------------------------------------------------------------------------------------------------------------------------------------------------------------------------------------------------------------------------|
| Journal:                      | <i>BMJ Open</i>                                                                                                                                                                                                                                                                                                               |
| Manuscript ID                 | bmjopen-2018-024189                                                                                                                                                                                                                                                                                                           |
| Article Type:                 | Research                                                                                                                                                                                                                                                                                                                      |
| Date Submitted by the Author: | 14-May-2018                                                                                                                                                                                                                                                                                                                   |
| Complete List of Authors:     | Puttige Ramesh, Nithya; Brown University School of Public Health, Epidemiology; The Dartmouth Institute for Health Policy and Clinical Practice, Learning and Innovation Lab<br>Arora, Manish; Icahn School of Medicine at Mount Sinai, Department of Preventive Medicine<br>Braun, Joseph M; Brown University , Epidemiology |
| Keywords:                     | EPIDEMIOLOGY, TOXICOLOGY, PUBLIC HEALTH, ORAL MEDICINE                                                                                                                                                                                                                                                                        |
|                               |                                                                                                                                                                                                                                                                                                                               |

SCHOLARONE™  
Manuscripts

View Only

1  
2  
3  
4  
5  
6  
7  
8  
9  
10  
11  
12  
13  
14  
15  
16  
17  
18  
19  
20  
21  
22  
23  
24  
25  
26  
27  
28  
29  
30  
31  
32  
33  
34  
35  
36  
37  
38  
39  
40  
41  
42  
43  
44  
45  
46  
47  
48  
49  
50  
51  
52  
53  
54  
55  
56  
57  
58  
59  
60

**Title: The Association between Serum Perfluoroalkyl Substance concentrations and Dental Caries Amongst US Children and Adolescents Aged 12 to 19 years. (NHANES 1999-2012)**

**Authors:** Nithya Ramesh<sup>1</sup>, BDS, MPH; Manish Arora<sup>2</sup> BDS, MPH, PhD, FICD; Joseph Braun<sup>1</sup>, MSPH, PhD

**Affiliations:**

1- Department of Epidemiology, Brown University, Providence, RI

2- Department of Environmental Medicine and Public Health, Icahn School of Medicine, Mount Sinai, NY

**Corresponding Author:**

Dr. Nithya Ramesh

37 Dewey Field Road, Hanover,

NH 03755; Ph. no: 401-489-3494;

email: nithya\_ramesh@alumni.brown.edu

**Word Count:** 2844 words (excluding title, abstract, references, declarations and tables)

**Other Authors' contact information:**

Dr. Joseph Braun: joseph\_braun\_1@brown.edu

Dr. Manish Arora: manish.arora@mssm.edu

**Abstract:**

**Study Objectives:** The objective of our study was to determine the relationship between PFAS exposure and dental caries prevalence in a nationally representative sample of US adolescents.

**Setting/Design:** We analyzed cross-sectional data from the National Health and Nutrition Examination Survey from 1999-2012 for 12-19-year-old US children.

**Participants:** Of the 10,856 adolescents age 12 to 19 years who had undergone a dental examination, 2,869 had dental assessments, laboratory measurements for serum PFAS concentrations, and complete covariate data and were included in our study.

**Primary and secondary outcome measures:** Dental caries prevalence was defined as the presence of decay or a restoration on any tooth surface, or the loss of a tooth due to tooth decay. We used multivariable logistic regression to estimate the covariate-adjusted association between serum PFAS concentrations and dental caries prevalence, and accounted for the complex survey design of the NHANES.

**Results:** Of 2,869 adolescents, 59% had one or more dental caries. We observed no associations between the prevalence of dental caries and serum concentrations of perfluorooctanoic acid (PFOA), perfluorooctane sulfonic acid (PFOS), or perfluorohexane sulfonic acid (PFHxS). However, we observed a trend suggesting a decrease in the prevalence of caries with increasing serum perfluorononanoic acid (PFNA) concentrations. The odds of caries were 21% (OR: 0.79; 95% CI: 0.63, 1.01), 15% (OR:0.85; 95% CI: 0.67, 1.08), and 30% (OR:0.7; 95% CI: 0.55, 0.90) lower among children in the 2<sup>nd</sup>, 3<sup>rd</sup>, and 4<sup>th</sup> quartiles of serum PFNA concentrations compared to children in the first quartile, respectively.

**Conclusion:** PFOA, PFOS and PFHxS were not associated with the prevalence of dental caries. While PFNA concentrations were associated with decreased caries prevalence, the inverse

1  
2  
3  
4  
5  
6  
7  
8  
9  
10  
11  
12  
13  
14  
15  
16  
17  
18  
19  
20  
21  
22  
23  
24  
25  
26  
27  
28  
29  
30  
31  
32  
33  
34  
35  
36  
37  
38  
39  
40  
41  
42  
43  
44  
45  
46  
47  
48  
49  
50  
51  
52  
53  
54  
55  
56  
57  
58  
59  
60

association could be confounded and additional adjustment for factors associated with higher PFAS and lower caries prevalence may attenuate it further.

For peer review only

### **Article Summary:**

#### Strengths and Limitations of this study:

- Our study contributes to a gap in literature by examining the relationship between PFAS exposure and dental caries prevalence amongst adolescents, which to the best of our knowledge, has not been done before in published literature.
- The strengths of our study include the large sample size (2,869 participants) and the nationally representative nature of the NHANES.
- In addition, we were able to adjust for important covariates that are associated with the prevalence of dental caries and PFAS concentrations, thereby improving the strength of our inferences.
- Though our study adjusted for numerous potential confounders, misclassified or unmeasured covariates, such as variables associated with dental hygiene, could be a weakness in our methods due to the nature of data collection by NHANES in the data cycles in our study. We used serum PFAS levels to measure PFAS exposure and thus, any physiologic process that could influence the excretion of both PFAS and caries risk could have created the inverse association between PFNA and caries prevalence.
- Additionally, reverse causation is a concern in cross-sectional studies like this one, as we cannot establish temporality between PFAS exposure and caries development.

### **Introduction:**

Poor oral health severely impacts an individual's quality of life by altering the ability to perform basic tasks such as eating or talking.<sup>1</sup> Of the diseases that affect the oral cavity, dental caries and periodontal infections are the most prevalent.<sup>2</sup> More than 91% of adults and 58% of adolescents in the US had a caries experience in 2012.<sup>3</sup> Children affected by dental caries have been reported to have poor growth, behavioral problems, and poor learning abilities, thus making it imperative to focus preventative efforts towards them.<sup>4</sup>

Although tooth decay is a biochemical process caused by the demineralization of tooth substance by bacteria, environmental factors have also been linked to dental caries.<sup>5</sup> Several studies have observed associations of pediatric dental caries with lead and passive tobacco smoking.<sup>6,7</sup> However, the role of environmental pollutants on oral health has not been adequately studied and is relatively unexplored. Children may be more sensitive to the effects of environmental toxicants on their dental health than adults due to their increased exposure to some toxicants, reduced detoxification capacity, or heightened sensitivity to environmental agents.<sup>8</sup>

Perfluoroalkyl substances (PFAS), are a group of compounds that have been in use for over 60 years and are predominantly used as industrial surfactants, stain repellants, and fire fighting foams.<sup>9</sup> Contaminated drinking water and food are the major routes of exposure, and to a lesser extent, house dust is also a minor source of PFAS exposure.<sup>10</sup> PFAS have biological half-lives on the order of years in humans, and 95% of the US population from 1999-2008 had detectable serum PFAS concentrations.<sup>11,12,13</sup> Although there is no direct evidence available for the effect of PFAS on teeth, some indirect evidence supports the possibility of an association. Prenatal PFAS exposure has been linked to adverse skeletal deformities.<sup>14,15</sup> Moreover, serum

1  
2  
3 PFOA levels have been associated with a decrease in spinal bone mineral density in  
4  
5 premenopausal women.<sup>16,17</sup> PFAS are also potential endocrine disrupting chemicals (EDCs),  
6  
7 including being associated with reduced levels of thyroid hormones, which are necessary for  
8  
9 stimulating growth plates and promoting linear growth, thereby affecting bone metabolism.<sup>18,19</sup>  
10  
11 Due to the similarity in structure, chemical composition, and mineralization processes in both  
12  
13 dentin and bone, it is plausible that PFAS could play a role in the mineralization of teeth as  
14  
15 well.<sup>17,18</sup> Finally, there is considerable evidence that some PFAS are immunotoxic and exposure  
16  
17 may promote dental caries by suppressing immune responses.<sup>20, 21, 24</sup>  
18  
19

20  
21 Based on this evidence we hypothesized that PFASs would be associated with tooth  
22  
23 demineralization. Our objective was to identify the presence of any relationship between PFAS  
24  
25 and the prevalence of dental infections in children given their potential susceptibility to  
26  
27 environmental chemical exposures.  
28  
29

### 30 **Methods:**

31  
32 *Study Participants:* We used a nationally representative sample of US adolescents aged 12 to 19  
33  
34 years. Data for this study was sourced from the National Health and Nutrition Examination  
35  
36 Survey (NHANES) conducted from 1999 to 2012 which has a target population of non-  
37  
38 institutionalized American civilians.<sup>26</sup> The 2001-2002 data was excluded since PFAS were not  
39  
40 analyzed in individual serum samples in this cycle.  
41  
42

43  
44 The NHANES is a cross-sectional study which combines interviews and physical  
45  
46 examinations of children and adults living in the United States to assess their health and  
47  
48 nutritional status. Data is collected using a complex, multi-stage probability design with over-  
49  
50 sampling of children below the age of 5, Mexican-Americans, and non-Hispanic blacks.  
51  
52 Information regarding interview processes, examination protocol, and sample collection can be  
53  
54



1  
2  
3 found elsewhere.<sup>27</sup> For our study, we included 10,856 adolescents age 12 to 19 years who had  
4  
5 undergone a dental examination, amongst whom 2,869 had dental assessments, laboratory  
6  
7 measurements for serum PFAS concentrations, and complete covariate data.  
8

9  
10 Dental Caries Assessment: A detailed report on the dental examination component of NHANES  
11  
12 has been described in earlier studies.<sup>28,29</sup> Briefly, dental examinations in NHANES were  
13  
14 performed on all participants aged 2 years or older and who did not meet the exclusion criteria  
15  
16 such as having orofacial pain or other medical reasons, physical limitations, inability to comply,  
17  
18 or were uncooperative.<sup>30</sup> Visual and tactile examination of the oral cavity were performed by  
19  
20 trained dentists who were licensed in at least one US state. Quality control was ensured by  
21  
22 including procedures such as having trained staff, use of standard examiners, and continuous  
23  
24 checks on inter-examiner reliability and consistency with the standard examiner.  
25  
26

27  
28 Our primary outcome was dental caries prevalence and it was defined as the presence  
29  
30 of decay or a restoration on any tooth surface, or the loss of a tooth following tooth decay. All  
31  
32 the four third molars (tooth numbers 1, 16, 17 and 32) were excluded in our analysis since caries  
33  
34 information for these teeth were not recorded in any of the data cycles. In the data cycles 2005-  
35  
36 2006, 2007-2008 and 2009-2010 the variables *ohxdecay* and *ohxrest* provided information about  
37  
38 the presence of at least one decayed surface or restoration per respondent. For the remaining  
39  
40 data cycles, a more detailed dental examination was conducted by recording the presence of  
41  
42 caries or a restoration on each surface of the tooth. If a tooth had both decay as well a  
43  
44 restoration, only the decay was noted. The total Decayed, Missing or Filled surfaces (DMFS) data  
45  
46 were computed for each participant and the presence of caries was operationalized as having at  
47  
48 least one decay or restoration per respondent to facilitate comparison with the other data  
49  
50  
51  
52  
53  
54  
55  
56  
57  
58  
59  
60

1  
2  
3 cycles. Normal eruption sequence and the age of the child were considered while evaluating  
4  
5 DMFS for mixed dentition.  
6

7 PFAS exposure: Serum perfluoroalkyl substance concentrations were quantified in a random  
8  
9 subsample of participants age 12-19 years. Serum concentrations of PFOS, PFOA,  
10  
11 perfluorohexane sulfonic acid (PFHxS), perfluorononanoic acid (PFNA), perfluoroheptanoic acid,  
12  
13 perfluorooctane sulfonamide, 2-(N-ethyl-perfluorooctane sulfonamide) acetic acid, 2-(N-methyl-  
14  
15 perfluorooctane sulfonamide) acetic acid, perfluorobutane sulfonic acid, perfluorodecanoic acid,  
16  
17 perfluoroundecanoic acid, and perfluorododecanoic acid were quantified in 100 µL of serum  
18  
19 using a modification of the method of Kuklenyik et al (2004)<sup>31</sup>. This method uses automated  
20  
21 solid-phase extraction coupled to reversed-phase high-performance liquid chromatography–  
22  
23 tandem mass spectrometry. Since the serum concentrations of PFOA, PFOS, PFNA and PFHxS  
24  
25 were detectable in more than 98% of the survey participants, only these substances were  
26  
27 included in our analysis. Other perfluoroalkyl substances were not considered due to their low  
28  
29 detection rate and lower median concentrations relative to the other four PFAS in our study.  
30  
31

32  
33 Covariates: Several covariates were considered as potential confounders based on their  
34  
35 relationship with both PFAS exposure and dental caries. Demographic variables included the age  
36  
37 of the participant, sex and race. Poverty to income ratio (PIR) of the child's family, which is the  
38  
39 ratio of the family income to the poverty threshold in the year of the interview, was used to  
40  
41 assess the socioeconomic status. A review of literature suggested that the parent or guardian's  
42  
43 education level should be considered as a potential confounder since lower education may be  
44  
45 associated with higher caries prevalence in the child.<sup>32</sup> Serum cotinine and blood lead levels  
46  
47 were also considered as potential confounders due to studies reporting an association with  
48  
49  
50  
51  
52  
53  
54  
55  
56  
57  
58  
59  
60

1  
2  
3 dental caries.<sup>733</sup> Whole blood lead concentrations were measured for all participants over the  
4  
5 age of 1 years using a previously described laboratory procedure.<sup>33</sup>  
6

7  
8 *Statistical Analysis:* Analyses were performed using SAS survey procedures (SAS Institute Inc.,  
9  
10 version 9.3). To account for the complex NHANES survey design, we used the 2-year sampling  
11  
12 weights (*wtmec2yr*), strata, and cluster variables to account for the complex sampling design as  
13  
14 recommended by the National Center for Health Statistics (NCHS).<sup>34</sup>  
15

16  
17 We started our analyses by performing univariate analysis of serum PFAS concentrations  
18  
19 and caries prevalence. Bivariable analysis was then conducted by examining how caries  
20  
21 prevalence and PFOA and PFOS concentrations varied by socio-demographic, environmental,  
22  
23 and health factors. We used logistic regression analysis with a binary outcome of dental caries  
24  
25 to examine the association between PFAS and dental caries prevalence. Using multivariable  
26  
27 logistic regression models, we calculated adjusted prevalence odds ratios (OR) and 95% CIs for  
28  
29 the top three quartiles of PFAS concentrations as compared to the first. We also estimated the  
30  
31 prevalence OR of caries with each 2-fold (i.e.,  $\log_2$ ) increase in serum PFAS concentrations.  
32  
33

34  
35 We conducted three sets of sensitivity analyses. First, using data from 2003-2012, we  
36  
37 adjusted for the mean total sugar intake due to its strong association with dental caries.<sup>35</sup> Total  
38  
39 dietary sugar intake was assessed using 24-hour food recalls conducted on two separate days in  
40  
41 the study years 2003 through 2012 and was considered as a confounder because dietary sugar  
42  
43 has been identified as one of the primary risk factors for the development of caries. Second, we  
44  
45 created a single multi-pollutant model that included  $\log_2$ -transformed PFOA, PFOS, PFNA and  
46  
47 PFHxS concentrations to determine if associations of one PFAS were confounded by another.  
48  
49 Finally, using data from the years 1999-2000, 2002-2003, 2004-2005 and 2011-2012 that had  
50  
51 detailed DMFS scores, we calculated a count ratio of carious surfaces by PFAS concentration  
52  
53  
54  
55  
56  
57  
58  
59  
60

1  
2  
3 using Poisson regression adjusting for race/ethnicity, age, gender, education level, family  
4 poverty to income ratio (PIR), serum cotinine and blood lead levels.  
5  
6  
7  
8  
9

### 10 **Results:**

11 Of the 2,869 participants, 1,644 (59%) had experienced one or more dental caries (Table 1). In  
12 bivariable analyses, females had a higher prevalence of caries (63%) than males (56%). Mexican  
13 Americans had the highest prevalence of dental caries (67%) relative to other races and  
14 ethnicities. Of children with family PIR below 1.0 (living below the poverty level), 63% of those  
15 belonging to this category were found to have dental caries compared to 54% of those  
16 belonging to the highest category of family PIR (above 1.85). Dental caries prevalence was  
17 inversely related to the education level of the respondent. Higher blood lead and serum cotinine  
18 concentrations were associated with higher prevalence of dental caries.  
19  
20  
21  
22  
23  
24  
25  
26  
27  
28  
29

30 Median (range) serum PFOA, PFOS, PFNA, and PFHxS concentrations were 3.5 ng/ml (0-  
31 22), 13 ng/mL (0-116), 0.8 ng/mL (0-6.7), and 1.8ng/mL (0-82), respectively (Table 2). PFOA and  
32 PFOS concentrations were in general higher amongst males and non-Hispanic whites. They were  
33 also higher among children from wealthier families and respondents with more education. PFOA  
34 and PFOS concentrations were also positively associated with serum cotinine and lead  
35 concentrations.  
36  
37  
38  
39  
40  
41  
42  
43

44 In both unadjusted and adjusted analyses, there was no association of PFOA, PFOS, and  
45 PFHxS with dental caries prevalence (Table 3). However, in unadjusted analyses, we observed a  
46 trend suggesting an inverse association between PFNA and caries prevalence where the odds of  
47 caries were 25% (OR: 0.75; 95% CI: 0.60, 0.94), 28% (OR:0.72; 95% CI: 0.59, 0.90), and 43%  
48 (OR:0.57; 95% CI: 0.46, 0.71) lower among children in the 2<sup>nd</sup>, 3<sup>rd</sup>, and 4<sup>th</sup> quartiles of serum  
49  
50  
51  
52  
53  
54  
55  
56  
57  
58  
59  
60

1  
2  
3 PFNA concentrations compared to children in the first quartile, respectively (Table 3). After  
4  
5 adjusting for potential confounders, the odds of caries were attenuated with increasing PFNA  
6  
7 concentrations, where children in the 2<sup>nd</sup>, 3<sup>rd</sup>, and 4<sup>th</sup> quartiles of serum PFNA concentrations  
8  
9 had 21% (OR: 0.79; 95% CI: 0.63, 1.01), 15% (OR:0.85; 95% CI: 0.67, 1.08), and 30% (OR:0.7; 95%  
10  
11 CI: 0.55, 0.90) lower odds of caries compared to children in the first quartile, respectively.  
12  
13

14 In sensitivity analyses adjusting for dietary sugar intake, there was no substantive  
15  
16 change in the association between PFAS exposure and caries prevalence in the model.  
17  
18 (Supplemental Table 1) We observed no meaningful changes when we jointly adjusting for all  
19  
20 four PFAS in the same model (Supplemental Table 1). Though the results were not statistically  
21  
22 significant, PFAS concentrations were generally associated with decreased DMFS counts.  
23  
24 (Supplemental Table 2).  
25  
26

### 27 **Discussion:**

28  
29 Using data from the nationally representative NHANES, we observed no evidence that  
30  
31 serum PFOA, PFOS and PFHxS concentrations were associated with the prevalence of dental  
32  
33 caries in 12-19-year-old US children. However, we observed a trend suggesting a decrease in the  
34  
35 prevalence of caries with increasing serum PFNA concentrations. Sensitivity analyses also did  
36  
37 not elicit any meaningful changes in this association.  
38  
39  
40

41 After adjustment for potential confounders, we observed that serum PFOA, PFOS, and  
42  
43 PFHxS concentrations were not associated with increased odds of experiencing dental caries.  
44  
45 This could be because of a true null association between these chemicals and caries prevalence.  
46  
47 Another reason for the null association could be due to incorrect exposure characterization by  
48  
49 measuring serum PFAS concentrations at the wrong time window in relation to our outcome.  
50  
51 For example, prenatal PFAS exposures may be more important in relation to tooth development  
52  
53  
54

1  
2  
3 given that teeth begin developing around 6 weeks of intrauterine life.<sup>36</sup> There is the potential for  
4  
5 PFAS to have effects on other dental outcomes and these warrant additional investigation. For  
6  
7 instance, PFAS may interfere with hormones that affect salivary gland function, which in turn  
8  
9 alters salivary rate in the oral cavity. Decreased salivation leads to dryness in the mouth and  
10  
11 poor oral clearance, thereby facilitating caries formation.<sup>37,39</sup> The quantity and quality of saliva  
12  
13 in the mouth is an important factor associated with caries incidence, and the endocrine  
14  
15 disrupting properties of PFAS may have altered the functioning of salivary glands.<sup>38-41</sup> However,  
16  
17 the NHANES does not include direct measures of salivary gland function, thus limiting our  
18  
19 investigation into this outcome.  
20  
21  
22

23 Interestingly, some longer chain PFAS displayed effects indicative of antibacterial action  
24  
25 against some microorganisms<sup>22,23,25</sup>. We observed a decrease in the prevalence of caries with  
26  
27 increasing serum PFNA concentrations. We speculate that the inverse association between  
28  
29 PFNA and dental caries we observed may be due to the effect of this PFAS on the peroxisome  
30  
31 proliferator-activated receptor alpha (PPAR $\alpha$ ). PPAR $\alpha$  is a transcription factor that regulates the  
32  
33 gene expression of enzymes and it has been shown to have anti-inflammatory properties.<sup>42</sup> In  
34  
35 rodent models, PFNA has been found to cause robust activation of PPARs.<sup>43</sup> Although the four  
36  
37 PFAS we examined have similar chemical structures and properties, the toxicokinetics of each  
38  
39 varies with the carbon chain length.<sup>43,44,45</sup> We speculate that PFNA, and not PFOA, PFOS, or  
40  
41 PFHxS was inversely associated with decreased dental caries prevalence by causing reduced  
42  
43 inflammation as its longer chain length is associated with more PPAR $\alpha$  agonism compared to  
44  
45 PFOA, PFOS, and PFHxS.<sup>46,39,47</sup> Long chain PFAS have displayed anti fouling properties and have  
46  
47 shown inhibitory action on the growth of algae and certain strains of bacteria in cell cultures.<sup>25</sup>  
48  
49 This could also explain why PFNA demonstrated a trend suggesting a protective association  
50  
51  
52  
53  
54  
55  
56  
57  
58  
59  
60

1  
2  
3 against dental caries. However, it is also possible that the protective associations we observed  
4  
5 for PFNA are due to confounding by factors that could not be assessed in to our study, including  
6  
7 tooth brushing habits, use of fluoridated toothpastes, and presence of dental sealants. It is  
8  
9 possible that the observed association between serum PFNA concentration and caries  
10  
11 prevalence would be attenuated to a null association after adjustment for this residual  
12  
13 confounding.  
14  
15

16  
17 To the best of our knowledge, this is the first epidemiologic study that examined the  
18  
19 relationship between PFAS exposure and dental caries prevalence amongst adolescents. The  
20  
21 strengths of our study include the large sample size and nationally representative nature of the  
22  
23 NHANES. In addition, we were able to adjust for important covariates that are associated with  
24  
25 the prevalence of dental caries and PFAS concentrations, thereby improving the strength of our  
26  
27 inferences. Though our study adjusted for numerous potential confounders, it is possible that  
28  
29 our results may have been confounded by misclassified or unmeasured covariates. For instance,  
30  
31 we were unable to adjust for the presence of dental sealants or use of fluoridated water; these  
32  
33 may be confounders due to their protective effect on teeth and potential association with PFAS  
34  
35 or factors associated with PFAS exposure. Patents show that some perfluorinated compounds  
36  
37 are used in toothpastes to increase fluoride-enamel interactions.<sup>48,49,50</sup> Thus, individuals who  
38  
39 brush more could have higher PFAS exposure and lower caries, which might explain the inverse  
40  
41 association we observed. However, we could not adjust for variables associated with dental  
42  
43 hygiene such as tooth brushing habits or use of fluoridated toothpastes since they were not  
44  
45 assessed by NHANES in the data cycles in our study.  
46  
47  
48  
49

50 We were also unable to assess earlier childhood exposure to PFAS since serum PFAS  
51  
52 concentrations were only measured in children ages 12 years and older. Another limitation in  
53  
54

1  
2  
3 our study is that we could not classify specific types of caries due to lack of tooth specific data in  
4  
5 some NHANES cycles. In addition, reverse causation is a concern in cross-sectional studies like  
6  
7 this one, as we cannot establish temporality between PFAS exposure and caries development.  
8  
9 We used serum PFAS levels to measure PFAS exposure and thus, any physiologic process that  
10  
11 could influence the excretion of both PFAS and caries risk could have created the inverse  
12  
13 association between PFNA and caries prevalence.  
14  
15

16 We observed no strong evidence suggesting an association between PFAS exposure and  
17  
18 dental caries prevalence, despite prior studies showing that PFAS is associated with reduced  
19  
20 bone mineral density and has actions as an endocrine disrupting compound and  
21  
22 immunotoxicant. Future studies may try to confirm the relationship between PFNA  
23  
24 concentrations and decreased dental caries prevalence, while adjusting for additional  
25  
26 confounding factors that we were unable to assess in our study. Though dental caries is  
27  
28 preventable, its prevalence has not seen much of a decline in the past decade in the United  
29  
30 States<sup>51</sup>. Environmental factors are overlooked in the study of oral diseases, despite knowledge  
31  
32 of the effects of toxicants such as tetracycline and minocycline on odontogenesis for decades.<sup>46</sup>  
33  
34 Therefore, future research should consider identifying the potential effect of other  
35  
36 environmental toxicants on oral health.  
37  
38  
39  
40  
41  
42  
43  
44  
45  
46  
47  
48  
49  
50  
51  
52  
53  
54  
55  
56  
57  
58  
59  
60



**List of Abbreviations:**

NHANES: National Health and Nutritional Survey

PFAS: Perfluoroalkyl Substances

PFOA: Perfluorooctanoic Acid

PFOS: Perfluorooctane Sulfonic Acid

PFHxS: Perfluorohexane Sulfonic Acid

PFNA: Perfluorononanoic Acid

EDCs: Endocrine Disrupting Chemicals

DMFS: Decayed, Missing or Filled Surfaces

PIR: Poverty to Income Ratio

NCHS: National Center for Health Statistics

OR: Odds Ratio

CI: Confidence Interval

PPAR $\alpha$ : Peroxisome Proliferator–Activated Receptor alpha

1  
2  
3 **Declarations:**  
4

5 **Ethics approval and consent to participate:**  
6

7 Not applicable  
8  
9

10 **Data statement:**  
11

12 All the datasets used are freely available from the NHANES website public archive, accessible at  
13  
14 NHANES Questionnaires, Datasets, and Related Documentation repository,  
15  
16 [https://wwwn.cdc.gov/nchs/nhanes/Default.aspx].  
17  
18

19 **Funding Statement:**  
20

21 This research received no specific grant from any funding agency in the public, commercial or  
22  
23 not-for-profit sectors.  
24

25 **Competing interests:**  
26

27 The authors declare that they have no competing interests.  
28  
29

30 **Author Contributions:**  
31

32 NR and JB were involved in study design, analysis and write up. NR was responsible for  
33  
34 literature search, preliminary analysis and initial draft. All authors were responsible for data  
35  
36 interpretation, and have read and approved the final manuscript.  
37  
38  
39  
40  
41  
42  
43  
44  
45  
46  
47  
48  
49  
50  
51  
52  
53  
54  
55  
56  
57  
58  
59  
60

## References:

1. Brennan DS, Spencer AJ, Roberts-Thomson KF. Tooth loss, chewing ability and quality of life. *Qual Life Res Int J Qual Life Asp Treat Care Rehabil* 2008;17(2):227–35.
2. Dye BA, Tan S, Smith V, et al. Trends in oral health status: United States, 1988-1994 and 1999-2004. *Vital Health Stat* 11 2007;(248):1–92.
3. Products - Data Briefs - Number 96 - May 2012 [Internet]. [cited 2015 Oct 15]; Available from: <http://www.cdc.gov/nchs/data/databriefs/db96.htm>
4. Tinanoff N, Reisine S. Update on Early Childhood Caries since the Surgeon General's Report. *Acad Pediatr* 2009;9(6):396–403.
5. Arora M, Weuve J, Schwartz J, Wright RO. Association of environmental cadmium exposure with pediatric dental caries. *Environ Health Perspect* 2008;116(6):821–5.
6. Aligne CA, Moss ME, Auinger P, Weitzman M. Association of pediatric dental caries with passive smoking. *JAMA* 2003;289(10):1258–64.
7. Arora M, Weuve J, Weisskopf MG, et al. Cumulative Lead Exposure and Tooth Loss in Men: The Normative Aging Study. *Environ Health Perspect* 2009;117(10):1531–4.
8. Selevan S. Identifying Critical Windows of Exposure for Children's Health. *Environ Health Perspect* 2000;108:451.
9. European Food Safety Authority (EFSA). Perfluorooctane sulfonate (PFOS), perfluorooctanoic acid (PFOA) and their salts Scientific Opinion of the Panel on Contaminants in the Food chain. *EFSA J* 2008;6(7):n/a-n/a.
10. Skutlarek D, Exner M, Färber H. Perfluorinated surfactants in surface and drinking waters. *Environ Sci Pollut Res Int* 2006;13(5):299–307.
11. Calafat AM, Wong L-Y, Kuklenyik Z, Reidy JA, Needham LL. Polyfluoroalkyl chemicals in the U.S. population: data from the National Health and Nutrition Examination Survey (NHANES) 2003-2004 and comparisons with NHANES 1999-2000. *Environ Health Perspect* 2007;115(11):1596–602.
12. Kato K, Wong L-Y, Jia LT, Kuklenyik Z, Calafat AM. Trends in exposure to polyfluoroalkyl chemicals in the U.S. Population: 1999-2008. *Environ Sci Technol* 2011;45(19):8037–45.
13. Olsen GW, Burris JM, Ehresman DJ, et al. Half-Life of Serum Elimination of Perfluorooctanesulfonate, Perfluorohexanesulfonate, and Perfluorooctanoate in Retired Fluorochemical Production Workers. *Environ Health Perspect* 2007;115(9):1298–305.
14. 3D-QSAR study of the endocrine disrupting effect of perfluorooctane sulfonates (PFOS) and perfluorooctanoic acid (PFOA) on human estrogen, androgen and thyroid receptors. ResearchGate [Internet] [cited 2017 Feb 22]; Available from: [https://www.researchgate.net/publication/43437065\\_3D-QSAR\\_study\\_of\\_the\\_endocrine\\_disrupting\\_effect\\_of\\_perfluorooctane\\_sulfonates\\_PFOS\\_and\\_perfluorooctanoic\\_acid\\_PFOA\\_on\\_human\\_estrogen\\_androgen\\_and\\_thyroid\\_receptors](https://www.researchgate.net/publication/43437065_3D-QSAR_study_of_the_endocrine_disrupting_effect_of_perfluorooctane_sulfonates_PFOS_and_perfluorooctanoic_acid_PFOA_on_human_estrogen_androgen_and_thyroid_receptors)
15. Khalil N, Chen A, Lee M, et al. Association of Perfluoroalkyl Substances, Bone Mineral Density, and Osteoporosis in the U.S. Population in NHANES 2009-2010. *Environ Health Perspect* 2016;124(1):81–7.
16. Lin L-Y, Wen L-L, Su T-C, Chen P-C, Lin C-Y. Negative association between serum perfluorooctane sulfate concentration and bone mineral density in US premenopausal women: NHANES, 2005-2008. *J Clin Endocrinol Metab* 2014;99(6):2173–80.
17. Williams GR. Thyroid Hormone Actions in Cartilage and Bone. *Eur Thyroid J* 2013;2(1):3–13

18. Kim J-Y, Kim M-R, Kim S-J. Modulation of osteoblastic/odontoblastic differentiation of adult mesenchymal stem cells through gene introduction: a brief review. *J Korean Assoc Oral Maxillofac Surg* 2013;39(2):55–62.
19. Liu G, Dhana K, Furtado JD, et al. Perfluoroalkyl substances and changes in body weight and resting metabolic rate in response to weight-loss diets: A prospective study. *PLoS Med* 2018;15(2):e1002502.
20. Vital SO, Gaucher C, Bardet C, et al. Tooth dentin defects reflect genetic disorders affecting bone mineralization. *Bone* 2012;50(4):989–97.
21. Immunotoxicity Associated with Exposure to Perfluorooctanoic Acid (PFOA) or Perfluorooctane Sulfonate (PFOS) [Internet]. [cited 2017 Apr 3]; Available from: <https://ntp.niehs.nih.gov/pubhealth/hat/noms/pfoa/index.html>
22. 978-87-93352-15-5.pdf [Internet]. [cited 2017 Apr 10]; Available from: <http://www2.mst.dk/Udgiv/publications/2015/05/978-87-93352-15-5.pdf>
23. Ecotoxicological assessment of surfactants in the aquatic environment.pdf [Internet]. [cited 2017 Apr 10]; Available from: <http://www3.uah.es/rosal/papers/Ecotoxicological%20assessment%20of%20surfactants%20in%20the%20aquatic%20environment.pdf>
24. Hekster FM, Laane RWPM, de Voogt P. Environmental and toxicity effects of perfluoroalkylated substances. *Rev Environ Contam Toxicol* 2003;179:99–121.
25. NHANES - National Health and Nutrition Examination Survey Homepage [Internet]. [cited 2016 Oct 19]; Available from: <http://www.cdc.gov/nchs/nhanes/index.htm>
26. NHANES - NHANES 2011–2012 Overview [Internet]. [cited 2017 Feb 22]; Available from: [https://www.cdc.gov/nchs/nhanes/nhanes2011-2012/overview\\_g.htm](https://www.cdc.gov/nchs/nhanes/nhanes2011-2012/overview_g.htm)
27. Drury TF, Winn DM, Snowden CB, Kingman A, Kleinman DV, Lewis B. An overview of the oral health component of the 1988-1991 National Health and Nutrition Examination Survey (NHANES III-Phase 1). *J Dent Res* 1996;75 Spec No:620–30.
28. Selwitz RH, Winn DM, Kingman A, Zion GR. The prevalence of dental sealants in the US population: findings from NHANES III, 1988-1991. *J Dent Res* 1996;75 Spec No:652–60.
29. oh-e.pdf [Internet]. [cited 2017 Apr 3]; Available from: <https://www.cdc.gov/nchs/data/nhanes/oh-e.pdf>
30. PFC\_F\_Polyfluorinated\_Compounds\_met.pdf [Internet]. [cited 2017 Apr 5]; Available from: [https://www.cdc.gov/nchs/data/nhanes/2009-2010/labmethods/PFC\\_F\\_Polyfluorinated\\_Compounds\\_met.pdf](https://www.cdc.gov/nchs/data/nhanes/2009-2010/labmethods/PFC_F_Polyfluorinated_Compounds_met.pdf)
31. Ju X, Jamieson LM, Mejia GC. Estimating the effects of maternal education on child dental caries using marginal structural models: The Longitudinal Study of Indigenous Australian Children. *Community Dent Oral Epidemiol* 2016;44(6):602–10.
32. Iida H, Kumar JV, Kopycka-Kedzierawski DT, Billings RJ. Effect of tobacco smoke on the oral health of U.S. women of childbearing age. *J Public Health Dent* 2009;69(4):231–41.
33. 2013\_MEC\_Laboratory\_Procedures\_Manual.pdf [Internet]. [cited 2017 Apr 5]; Available from: [https://www.cdc.gov/nchs/data/nhanes/nhanes\\_13\\_14/2013\\_MEC\\_Laboratory\\_Procedures\\_Manual.pdf](https://www.cdc.gov/nchs/data/nhanes/nhanes_13_14/2013_MEC_Laboratory_Procedures_Manual.pdf)
34. NHANES - NHANES III Web Tutorial - Specifying Weighting Parameters [Internet]. [cited 2017 Mar 19]; Available from: [https://www.cdc.gov/nchs/tutorials/nhanes/SurveyDesign/Weighting/intro\\_iii.htm](https://www.cdc.gov/nchs/tutorials/nhanes/SurveyDesign/Weighting/intro_iii.htm)



**Table 1: Descriptive characteristics, caries prevalence, and perfluoroalkyl substance concentrations by socio-demographic, environmental, and health factors of the 2,869 12 to 19-year-old US children and adolescents. (NHANES 1999-2012)**

| Covariates                                 | N (%) with<br>>1 caries | PFOA<br>Median<br>(25 <sup>th</sup> , 75 <sup>th</sup> ) | PFOS Median<br>(25 <sup>th</sup> , 75 <sup>th</sup> ) | PFNA<br>Median<br>(25 <sup>th</sup> , 75 <sup>th</sup> ) | PFHxS<br>Median<br>(25 <sup>th</sup> , 75 <sup>th</sup> ) |
|--------------------------------------------|-------------------------|----------------------------------------------------------|-------------------------------------------------------|----------------------------------------------------------|-----------------------------------------------------------|
| <b>Overall</b>                             | 1644 (59)               | 3.1 (2.1, 4.4)                                           | 11.0 (5.9, 17)                                        | 0.9 (0.6, 1.2)                                           | 1.7 (0.9, 3.6)                                            |
| <b>Sex</b>                                 |                         |                                                          |                                                       |                                                          |                                                           |
| Male                                       | 824(56)                 | 4.0 (2.7, 5.5)                                           | 15.0 (8, 25)                                          | 1.0 (0.6, 1.3)                                           | 2.1 (1.1, 4.2)                                            |
| Female                                     | 820(63)                 | 3.1 (2.1, 4.4)                                           | 12.0 (6.7, 20)                                        | 0.7 (0.5, 1.1)                                           | 1.5 (0.8, 3)                                              |
| <b>Race</b>                                |                         |                                                          |                                                       |                                                          |                                                           |
| Mexican American                           | 591(67)                 | 3.2 (2.2, 4.6)                                           | 12.0 (6.8, 20)                                        | 0.6 (0.4, 1)                                             | 1.4 (0.8, 2.8)                                            |
| Other Hispanic                             | 118 (60)                | 3.1 (2.2, 4.7)                                           | 8.0 (4.6, 16)                                         | 0.9 (0.6, 1.3)                                           | 1.1 (0.6, 2.3)                                            |
| Non-Hispanic white                         | 408 (57)                | 3.9 (2.7, 5.3)                                           | 15.0 (8.5, 25)                                        | 0.9 (0.6, 1.3)                                           | 2.6 (1.3, 5.1)                                            |
| Non-Hispanic black                         | 429 (53)                | 3.6 (2.3, 5.2)                                           | 15.0 (8.7, 25)                                        | 0.9 (0.6, 1.2)                                           | 2.0 (1.1, 3.9)                                            |
| Other non-Hispanic<br>race                 | 98 (58)                 | 2.7 (2, 4.1)                                             | 9.5 (4.9, 19)                                         | 0.9 (0.6, 1.2)                                           | 1.6 (0.7, 3.3)                                            |
| <b>Age</b>                                 |                         |                                                          |                                                       |                                                          |                                                           |
| 12                                         | 164 (48)                | 3.7 (2.5, 5.0)                                           | 14.0 (7.1, 26)                                        | 0.8 (0.5, 1.2)                                           | 2.0 (1.1, 4.3)                                            |
| 13                                         | 187 (50)                | 3.4 (2.3, 5.0)                                           | 13.0 (5.9, 23)                                        | 0.8 (0.5, 1.2)                                           | 1.7 (0.9, 3.6)                                            |
| 14                                         | 200 (58)                | 3.2 (2.3, 4.5)                                           | 12.0 (6.8, 22)                                        | 0.9 (0.6, 1.2)                                           | 1.8 (1.0, 3.4)                                            |
| 15                                         | 187 (58)                | 3.2 (2.3, 4.7)                                           | 14.0 (7.3, 21)                                        | 0.8 (0.5, 1.1)                                           | 2.0 (0.9, 3.6)                                            |
| 16                                         | 207 (60)                | 3.6 (2.3, 5.0)                                           | 13.0 (7.4, 23)                                        | 0.7 (0.5, 1.2)                                           | 1.9 (0.9, 3.7)                                            |
| 17                                         | 218 (65)                | 3.8 (2.5, 5.3)                                           | 14.0 (8.2, 24)                                        | 0.8 (0.6, 1.3)                                           | 1.8 (1.0, 3.9)                                            |
| 18                                         | 255 (70)                | 3.4 (2.3, 5.2)                                           | 14.0 (8.1, 22)                                        | 0.8 (0.5, 1.1)                                           | 1.6 (0.8, 3.6)                                            |
| 19                                         | 226 (67)                | 3.4 (2.3, 5.1)                                           | 13.0 (7.3, 22)                                        | 0.8 (0.6, 1.2)                                           | 1.7 (0.9, 3.6)                                            |
| <b>Family PIR</b>                          |                         |                                                          |                                                       |                                                          |                                                           |
| <1                                         | 668 (63)                | 3.2 (2.2, 4.7)                                           | 12 (6.2, 20)                                          | 0.8 (0.5, 1.1)                                           | 1.6 (0.8, 3.1)                                            |
| 1-1.85                                     | 388 (62)                | 3.4 (2.3, 4.9)                                           | 14 (7.0, 22)                                          | 0.8 (0.5, 1.2)                                           | 1.8 (0.9, 3.6)                                            |
| >1.85                                      | 588 (54)                | 3.8 (2.6, 5.3)                                           | 15 (8.7, 25)                                          | 0.9 (0.6, 1.3)                                           | 2.1 (1.1, 4.3)                                            |
| <b>Education level of<br/>  respondent</b> |                         |                                                          |                                                       |                                                          |                                                           |
| < High school                              | 593 (63)                | 3.3 (2.3, 4.7)                                           | 12.0 (6.8, 20)                                        | 0.7 (0.4, 1.1)                                           | 1.4 (0.8, 2.9)                                            |
| High school                                | 403 (61)                | 3.6 (2.3, 5.1)                                           | 14.0 (7.4, 24)                                        | 0.8 (0.6, 1.2)                                           | 1.9 (1.0, 3.7)                                            |
| > High school                              | 576 (55)                | 3.7 (2.5, 5.2)                                           | 14.0 (7.5, 24)                                        | 0.9 (0.6, 1.2)                                           | 2.2 (1.1, 4.5)                                            |
| <b>Serum cotinine<br/>  (ng/ml)</b>        |                         |                                                          |                                                       |                                                          |                                                           |
| <0.05                                      | 651 (55)                | 3.4 (2.3, 4.9)                                           | 14.0 (7.6, 23)                                        | 0.8 (0.5, 1.2)                                           | 1.7 (0.9, 3.6)                                            |
| 0.05 to ≤ 3                                | 690 (60)                | 3.5 (2.3, 4.9)                                           | 12.0 (6.9, 23)                                        | 0.8 (0.5, 1.2)                                           | 1.9 (1.0, 3.7)                                            |
| >3                                         | 303 (70)                | 3.8 (2.5, 5.5)                                           | 13.0 (7.2, 21)                                        | 0.8 (0.6, 1.2)                                           | 2.0 (1.1, 4.4)                                            |
| <b>Blood Lead</b>                          |                         |                                                          |                                                       |                                                          |                                                           |
| <0.69                                      | 537 (57)                | 2.8 (1.9, 4.2)                                           | 9.7 (5.2, 17)                                         | 0.8 (0.6, 1.2)                                           | 1.7 (0.8, 3.3)                                            |
| 0.7 to 1.10                                | 544 (59)                | 3.7 (2.5, 5.2)                                           | 14.0 (8.4, 23)                                        | 0.9 (0.6, 1.3)                                           | 1.9 (1.0, 3.9)                                            |
| >1.11                                      | 563 (62)                | 4.0 (2.8, 5.6)                                           | 16.0 (9.5, 26)                                        | 0.7 (0.4, 1.1)                                           | 2.0 (1.0, 4.0)                                            |

**Table 2: Univariate statistics of PFAS concentrations among 2,869 12 to 19-year-old US children and adolescents. (NHANES 1999-2012)**

| Variable | Min  | 25  | Median | 75  | Max |
|----------|------|-----|--------|-----|-----|
| PFOA     | <0.1 | 2.3 | 3.5    | 4.9 | 22  |
| PFOS     | 0.3  | 7.2 | 13     | 22  | 116 |
| PFNA     | <0.1 | 0.5 | 0.8    | 1.2 | 6.7 |
| PFHxS    | <0.1 | 0.9 | 1.8    | 3.7 | 82  |

For peer review only

**Table 3: Unadjusted and adjusted prevalence odds ratio of caries by perfluoroalkyl substance concentrations among 12 to 19-year-old US children and adolescents (NHANES 1999-2012)**

| PFAS Quartile<br>(range, ng/mL) | N caries (%) | Unadjusted OR<br>(95% CI) | Adjusted OR<br>(95% CI) <sup>a</sup> |
|---------------------------------|--------------|---------------------------|--------------------------------------|
| <b>PFOA</b>                     |              |                           |                                      |
| 0.0-2.3                         | 427 (62)     | Ref                       | Ref                                  |
| 2.4-3.5                         | 400 (58)     | 0.85 (0.69, 1.06)         | 0.95 (0.74, 1.20)                    |
| 3.6-4.9                         | 410 (59)     | 0.87 (0.70, 1.05)         | 1.04 (0.82, 1.32)                    |
| 5.0-22                          | 407 (59)     | 0.86 (0.69, 1.06)         | 0.95 (0.74, 1.21)                    |
| Log2 PFOA                       | N/A          | 0.95 (0.87, 1.04)         | 1.00 (0.91, 1.12)                    |
| <b>PFOS:</b>                    |              |                           |                                      |
| 0.0-7.2                         | 421 (61)     | Ref                       | Ref                                  |
| 7.3-13                          | 399 (58)     | 0.91 (0.73, 1.12)         | 0.91 (0.72, 1.16)                    |
| 14-22                           | 421 (61)     | 1.01 (0.81, 1.25)         | 1.02 (0.81, 1.31)                    |
| 23-116                          | 403 (58)     | 0.87 (0.71, 1.09)         | 0.92 (0.72, 1.17)                    |
| Log2 PFOS                       | N/A          | 0.97 (0.91, 1.04)         | 0.99 (0.92, 1.07)                    |
| <b>PFNA:</b>                    |              |                           |                                      |
| 0.0-0.5                         | 467 (66)     | Ref                       | Ref                                  |
| 0.6-0.8                         | 422 (60)     | 0.75 (0.60, 0.94)         | 0.79 (0.63, 1.01)                    |
| 0.9-1.2                         | 407 (59)     | 0.72 (0.59, 0.90)         | 0.85 (0.67, 1.08)                    |
| 1.3-6.7                         | 348 (53)     | 0.57 (0.46, 0.71)         | 0.70 (0.55, 0.90)                    |
| Log2 PFNA                       | N/A          | 0.85 (0.78, 0.91)         | 0.93 (0.85, 1.01)                    |
| <b>PFHxS:</b>                   |              |                           |                                      |
| 0.0-0.9                         | 440 (64)     | Ref                       | Ref                                  |
| 1.0-1.8                         | 418 (59)     | 0.82 (0.66, 1.02)         | 0.87 (0.68, 1.10)                    |
| 1.9-3.7                         | 372 (54)     | 0.67 (0.54, 0.83)         | 0.78 (0.61, 0.99)                    |
| 3.8-82                          | 414 (60)     | 0.84 (0.68, 1.05)         | 1.04 (0.81, 1.33)                    |
| Log2 PFHS                       | N/A          | 0.95 (0.90, 1.00)         | 1.00 (0.94, 1.05)                    |

a-Adjusted for: Child gender, race (Mexican American, other Hispanic, non-Hispanic white, non-Hispanic black, other non-Hispanic race), education level of the parent/guardian (<12; 12; some college education), Family PIR (<1, 1-1.85, >1.85), blood lead and serum cotinine levels.



**Supplemental Tables:****Supplemental Table 1: Adjusted prevalence odds ratio of caries by perfluoroalkyl substance concentrations among 12 to 19-year-old US children and adolescents (2003-2012): Sensitivity analyses comparing adjustment for dietary sugar intake and multi-pollutant model of serum PFAS concentrations.**

| PFAS  | Adjusted Model 1 <sup>a</sup> | Adjusted-Model 2 <sup>b</sup> | Adjusted-Model 3 <sup>c</sup> |
|-------|-------------------------------|-------------------------------|-------------------------------|
| PFOA  | 0.95 (0.87, 1.04)             | 0.94 (0.84, 1.06)             | 0.93 (0.83, 1.05)             |
| PFOS  | 0.93 (0.85, 1.01)             | 0.92 (0.85, 1.00)             | 0.92 (0.85, 1.02)             |
| PFNA  | 0.95 (0.85, 1.05)             | 0.95 (0.85, 1.05)             | 0.95 (0.85, 1.05)             |
| PFHxS | 0.95 (0.90, 0.99)             | 0.96 (0.90, 1.02)             | 0.96 (0.90, 1.02)             |

<sup>a</sup> Adjusted for: Child Age, Gender, Race (Mexican American, other Hispanic, non-Hispanic white, non-Hispanic black, other non-Hispanic race), Education level of the parent/guardian (<12; 12; some college education), Family PIR (<1, 1-1.85, >1.85), blood lead, and serum cotinine levels.

<sup>b</sup> Adjusted for: Child Age, Gender, Race (Mexican American, other Hispanic, non-Hispanic white, non-Hispanic black, other non-Hispanic race), Education level of the parent/guardian (<12; 12; some college education), Family PIR (<1, 1-1.85, >1.85), log transformed PFOA concentration, log transformed PFOS concentration, log transformed PFNA concentration, log transformed PFHxS concentration, blood lead, and serum cotinine levels.

<sup>c</sup> Adjusted for: Dietary sugar intake, Child Age, Gender, Race (Mexican American, other Hispanic, non-Hispanic white, non-Hispanic black, other non-Hispanic race), Education level of the parent/guardian (<12; 12; some college education), Family PIR (<1, 1-1.85, >1.85), blood lead, and serum cotinine levels

**Supplemental Table 2: Sensitivity analysis demonstrating count ratios of surface level dental caries by log transformed PFAS concentrations among 12 to 19-year-old US children and adolescents (NHANES 1999-2014)**

| PFAS  | Count Ratio <sup>a</sup> | 95% CI <sup>a</sup> |
|-------|--------------------------|---------------------|
| PFOA  | 0.990                    | 0.989-0.990         |
| PFOS  | 0.948                    | 0.947-0.948         |
| PFNA  | 0.985                    | 0.984-0.985         |
| PFHxS | 0.974                    | 0.973-0.974         |

<sup>a</sup> Adjusted for: Child Age, Gender, Race (Mexican American, other Hispanic, non-Hispanic white, non-Hispanic black, other non-Hispanic race), Education level of the parent/guardian (<12; 12; some college education), Family PIR (<1, 1-1.85, >1.85), blood lead, and serum cotinine levels.

# Reporting checklist for cross sectional study.

Based on the STROBE cross sectional guidelines.

## Instructions to authors

Complete this checklist by entering the page numbers from your manuscript where readers will find each of the items listed below.

Your article may not currently address all the items on the checklist. Please modify your text to include the missing information. If you are certain that an item does not apply, please write "n/a" and provide a short explanation.

Upload your completed checklist as an extra file when you submit to a journal.

In your methods section, say that you used the STROBE cross sectional reporting guidelines, and cite them as:

von Elm E, Altman DG, Egger M, Pocock SJ, Gotsche PC, Vandembroucke JP. The Strengthening the Reporting of Observational Studies in Epidemiology (STROBE) Statement: guidelines for reporting observational studies.

|                        |     | Reporting Item                                                                                                                  | Page Number |
|------------------------|-----|---------------------------------------------------------------------------------------------------------------------------------|-------------|
| Title                  | #1a | Indicate the study's design with a commonly used term in the title or the abstract                                              | 1           |
| Abstract               | #1b | Provide in the abstract an informative and balanced summary of what was done and what was found                                 | 2           |
| Background / rationale | #2  | Explain the scientific background and rationale for the investigation being reported                                            | 3           |
| Objectives             | #3  | State specific objectives, including any prespecified hypotheses                                                                | 3           |
| Study design           | #4  | Present key elements of study design early in the paper                                                                         | 2, 6        |
| Setting                | #5  | Describe the setting, locations, and relevant dates, including periods of recruitment, exposure, follow-up, and data collection | 6           |
| Eligibility criteria   | #6a | Give the eligibility criteria, and the sources and methods of selection of participants.                                        | 7           |

|    |                  |      |                                                                   |     |
|----|------------------|------|-------------------------------------------------------------------|-----|
| 1  |                  | #7   | Clearly define all outcomes, exposures, predictors, potential     | 7   |
| 2  |                  |      | confounders, and effect modifiers. Give diagnostic criteria, if   |     |
| 3  |                  |      | applicable                                                        |     |
| 4  |                  |      |                                                                   |     |
| 5  |                  |      |                                                                   |     |
| 6  | Data sources /   | #8   | For each variable of interest give sources of data and details of | 6-7 |
| 7  | measurement      |      | methods of assessment (measurement). Describe                     |     |
| 8  |                  |      | comparability of assessment methods if there is more than one     |     |
| 9  |                  |      | group. Give information separately for for exposed and            |     |
| 10 |                  |      | unexposed groups if applicable.                                   |     |
| 11 |                  |      |                                                                   |     |
| 12 |                  |      |                                                                   |     |
| 13 |                  |      |                                                                   |     |
| 14 | Bias             | #9   | Describe any efforts to address potential sources of bias         | 9   |
| 15 |                  |      |                                                                   |     |
| 16 |                  |      |                                                                   |     |
| 17 | Study size       | #10  | Explain how the study size was arrived at                         | 7   |
| 18 |                  |      |                                                                   |     |
| 19 | Quantitative     | #11  | Explain how quantitative variables were handled in the            | 8   |
| 20 | variables        |      | analyses. If applicable, describe which groupings were chosen,    |     |
| 21 |                  |      | and why                                                           |     |
| 22 |                  |      |                                                                   |     |
| 23 |                  |      |                                                                   |     |
| 24 | Statistical      | #12a | Describe all statistical methods, including those used to control | 9   |
| 25 | methods          |      | for confounding                                                   |     |
| 26 |                  |      |                                                                   |     |
| 27 |                  |      |                                                                   |     |
| 28 |                  | #12b | Describe any methods used to examine subgroups and                | 9   |
| 29 |                  |      | interactions                                                      |     |
| 30 |                  |      |                                                                   |     |
| 31 |                  |      |                                                                   |     |
| 32 |                  | #12c | Explain how missing data were addressed                           | 9   |
| 33 |                  |      |                                                                   |     |
| 34 |                  |      |                                                                   |     |
| 35 |                  | #12d | If applicable, describe analytical methods taking account of      | 9   |
| 36 |                  |      | sampling strategy                                                 |     |
| 37 |                  |      |                                                                   |     |
| 38 |                  |      |                                                                   |     |
| 39 |                  | #12e | Describe any sensitivity analyses                                 | 9   |
| 40 |                  |      |                                                                   |     |
| 41 | Participants     | #13a | Report numbers of individuals at each stage of study—eg           | 10  |
| 42 |                  |      | numbers potentially eligible, examined for eligibility, confirmed |     |
| 43 |                  |      | eligible, included in the study, completing follow-up, and        |     |
| 44 |                  |      | analysed. Give information separately for for exposed and         |     |
| 45 |                  |      | unexposed groups if applicable.                                   |     |
| 46 |                  |      |                                                                   |     |
| 47 |                  |      |                                                                   |     |
| 48 |                  |      |                                                                   |     |
| 49 |                  | #13b | Give reasons for non-participation at each stage                  | 6   |
| 50 |                  |      |                                                                   |     |
| 51 |                  |      |                                                                   |     |
| 52 |                  | #13c | Consider use of a flow diagram                                    | 6   |
| 53 |                  |      |                                                                   |     |
| 54 | Descriptive data | #14a | Give characteristics of study participants (eg demographic,       | 10  |
| 55 |                  |      | clinical, social) and information on exposures and potential      |     |
| 56 |                  |      | confounders. Give information separately for exposed and          |     |
| 57 |                  |      | unexposed groups if applicable.                                   |     |
| 58 |                  |      |                                                                   |     |
| 59 |                  |      |                                                                   |     |
| 60 |                  |      |                                                                   |     |

|    |                  |      |                                                                      |       |
|----|------------------|------|----------------------------------------------------------------------|-------|
| 1  |                  | #14b | Indicate number of participants with missing data for each           | 10    |
| 2  |                  |      | variable of interest                                                 |       |
| 3  |                  |      |                                                                      |       |
| 4  |                  |      |                                                                      |       |
| 5  | Outcome data     | #15  | Report numbers of outcome events or summary measures.                | 10    |
| 6  |                  |      | Give information separately for exposed and unexposed                |       |
| 7  |                  |      | groups if applicable.                                                |       |
| 8  |                  |      |                                                                      |       |
| 9  |                  |      |                                                                      |       |
| 10 | Main results     | #16a | Give unadjusted estimates and, if applicable, confounder-            | 10    |
| 11 |                  |      | adjusted estimates and their precision (eg, 95% confidence           |       |
| 12 |                  |      | interval). Make clear which confounders were adjusted for and        |       |
| 13 |                  |      | why they were included                                               |       |
| 14 |                  |      |                                                                      |       |
| 15 |                  |      |                                                                      |       |
| 16 |                  |      |                                                                      |       |
| 17 |                  | #16b | Report category boundaries when continuous variables were            | 10    |
| 18 |                  |      | categorized                                                          |       |
| 19 |                  |      |                                                                      |       |
| 20 |                  |      |                                                                      |       |
| 21 |                  | #16c | If relevant, consider translating estimates of relative risk into    | 10-11 |
| 22 |                  |      | absolute risk for a meaningful time period                           |       |
| 23 |                  |      |                                                                      |       |
| 24 | Other analyses   | #17  | Report other analyses done—e.g., analyses of subgroups and           | 10-11 |
| 25 |                  |      | interactions, and sensitivity analyses                               |       |
| 26 |                  |      |                                                                      |       |
| 27 |                  |      |                                                                      |       |
| 28 | Key results      | #18  | Summarise key results with reference to study objectives             | 11    |
| 29 |                  |      |                                                                      |       |
| 30 |                  |      |                                                                      |       |
| 31 | Limitations      | #19  | Discuss limitations of the study, taking into account sources of     | 13    |
| 32 |                  |      | potential bias or imprecision. Discuss both direction and            |       |
| 33 |                  |      | magnitude of any potential bias.                                     |       |
| 34 |                  |      |                                                                      |       |
| 35 |                  |      |                                                                      |       |
| 36 | Interpretation   | #20  | Give a cautious overall interpretation considering objectives,       | 14    |
| 37 |                  |      | limitations, multiplicity of analyses, results from similar studies, |       |
| 38 |                  |      | and other relevant evidence.                                         |       |
| 39 |                  |      |                                                                      |       |
| 40 |                  |      |                                                                      |       |
| 41 | Generalisability | #21  | Discuss the generalisability (external validity) of the study        | 14    |
| 42 |                  |      | results                                                              |       |
| 43 |                  |      |                                                                      |       |
| 44 |                  |      |                                                                      |       |
| 45 | Funding          | #22  | Give the source of funding and the role of the funders for the       | 16    |
| 46 |                  |      | present study and, if applicable, for the original study on which    |       |
| 47 |                  |      | the present article is based                                         |       |
| 48 |                  |      |                                                                      |       |
| 49 |                  |      |                                                                      |       |

The STROBE checklist is distributed under the terms of the Creative Commons Attribution License CC-BY. This checklist was completed on 14. May 2018 using <http://www.goodreports.org/>, a tool made by the [EQUATOR Network](#) in collaboration with [Penelope.ai](#)

# BMJ Open

## A Cross Sectional Study of the Association between Serum Perfluorinated Alkyl Acid concentrations and Dental Caries Amongst US Adolescents (NHANES 1999-2012)

|                                 |                                                                                                                                                                                                                                                                                                                               |
|---------------------------------|-------------------------------------------------------------------------------------------------------------------------------------------------------------------------------------------------------------------------------------------------------------------------------------------------------------------------------|
| Journal:                        | <i>BMJ Open</i>                                                                                                                                                                                                                                                                                                               |
| Manuscript ID                   | bmjopen-2018-024189.R1                                                                                                                                                                                                                                                                                                        |
| Article Type:                   | Research                                                                                                                                                                                                                                                                                                                      |
| Date Submitted by the Author:   | 13-Nov-2018                                                                                                                                                                                                                                                                                                                   |
| Complete List of Authors:       | Puttige Ramesh, Nithya; Brown University School of Public Health, Epidemiology; The Dartmouth Institute for Health Policy and Clinical Practice, Learning and Innovation Lab<br>Arora, Manish; Icahn School of Medicine at Mount Sinai, Department of Preventive Medicine<br>Braun, Joseph M; Brown University , Epidemiology |
| <b>Primary Subject Heading</b>: | Epidemiology                                                                                                                                                                                                                                                                                                                  |
| Secondary Subject Heading:      | Dentistry and oral medicine, Health policy, Public health                                                                                                                                                                                                                                                                     |
| Keywords:                       | EPIDEMIOLOGY, TOXICOLOGY, PUBLIC HEALTH, ORAL MEDICINE, PFAA, Caries                                                                                                                                                                                                                                                          |
|                                 |                                                                                                                                                                                                                                                                                                                               |

SCHOLARONE™  
Manuscripts

1  
2  
3  
4  
5  
6  
7  
8  
9  
10  
11  
12  
13  
14  
15  
16  
17  
18  
19  
20  
21  
22

**Title: A Cross Sectional Study of the Association between Serum Perfluorinated Alkyl Acid concentrations and Dental Caries Amongst US Adolescents (NHANES 1999-2012)**

**Authors:** Nithya Ramesh<sup>1</sup>, BDS, MPH; Manish Arora<sup>2</sup> BDS, MPH, PhD, FICD; Joseph Braun<sup>1</sup>, MSPH, PhD

23  
24  
25  
26  
27  
28  
29  
30  
31  
32  
33  
34  
35  
36  
37  
38  
39  
40  
41  
42  
43  
44  
45  
46  
47  
48  
49  
50  
51  
52  
53  
54  
55  
56  
57  
58  
59  
60

**Affiliations:**

1- Department of Epidemiology, Brown University, Providence, RI

2- Department of Environmental Medicine and Public Health, Icahn School of Medicine, Mount Sinai, NY

**Corresponding Author:**

Dr. Nithya Ramesh

37 Dewey Field Road, Hanover,

NH 03755; Ph. no: 401-489-3494;

email: [nithya\\_ramesh@alumni.brown.edu](mailto:nithya_ramesh@alumni.brown.edu)

**Word Count:** 2844 words (excluding title, abstract, references, declarations and tables)

**Other Authors' contact information:**

Dr. Joseph Braun: joseph\_braun\_1@brown.edu

Dr. Manish Arora: manish.arora@mssm.edu

**Abstract:**

**Study Objectives:** Perfluoroalkyl acids (PFAAs) are a class of anthropogenic and persistent compounds that may impact some biological pathways related to oral health. The objective of our study was to estimate the relationship between dental caries prevalence and exposure to four PFAA: perfluorooctanoic acid (PFOA), perfluorononanoic acid (PFNA), perfluorohexane sulfonic acid (PFHxS), and perfluorooctane sulfonic acid (PFOS) in a nationally representative sample of US adolescents.

**Setting/Design:** We analyzed cross-sectional data from the National Health and Nutrition Examination Survey from 1999-2012 for 12-19-year-old US adolescents.

**Participants:** Of 10,856 adolescents age 12 to 19 years who had a dental examination, we included 2,869 with laboratory measurements for serum PFAA concentrations and complete covariate data in our study.

**Primary and secondary outcome measures:** Dental caries prevalence was defined as the presence of decay or a restoration on any tooth surface, or the loss of a tooth due to tooth decay. We used multivariable logistic regression to estimate the covariate-adjusted association between serum PFAA concentrations and dental caries prevalence, accounting for the complex NHANES survey design.

**Results:** Of 2,869 adolescents, 59% had one or more dental caries. We observed no associations between the prevalence of dental caries and serum concentrations of PFOA, PFOS, or PFHxS. The adjusted odds of caries were 21% (OR: 0.79; 95% CI:0.63, 1.01), 15% (OR:0.85; 95% CI:0.67, 1.08), and 30% (OR:0.7; 95% CI:0.55, 0.90) lower among adolescents in the 2<sup>nd</sup>, 3<sup>rd</sup>, and 4<sup>th</sup> serum PFNA concentration quartiles compared to adolescents in the first quartile, respectively. The linear trend for this association was not statistically significant.



1  
2 Conclusion: PFOA, PFOS and PFHxS were not associated with prevalence of dental caries. The  
3  
4 prevalence of caries was reduced with increasing serum PFNA concentrations; however, these  
5  
6 results should be interpreted cautiously given that we were unable to adjust for several factors  
7  
8 related to oral health.  
9  
10  
11  
12  
13  
14  
15  
16  
17  
18  
19  
20  
21  
22  
23  
24  
25  
26  
27  
28  
29  
30  
31  
32  
33  
34  
35  
36  
37  
38  
39  
40  
41  
42  
43  
44  
45  
46  
47  
48  
49  
50  
51  
52  
53  
54  
55  
56  
57  
58  
59  
60

For peer review only

**Article Summary:**

Strengths and limitations of this study:

- Our study contributes to a gap in literature by examining the relationship between PFAA exposure and dental caries prevalence amongst adolescents, which to the best of our knowledge, has not been examined before.
- The strengths of our study include the large sample size (2,869 participants) and the nationally representative nature of the National Health and Nutrition Examination Survey (NHANES).
- Although we adjusted for potential confounders, misclassified or unmeasured covariates, such dental hygiene, is a weakness of our study; these data were not collected in the NHANES data cycles we used.

Patient and public involvement: We used publicly available and de-identified National Health and Nutrition Examination Survey data collected by the National Center for Health Statistics for the present study. No patients were involved in the design of our study.

## **Introduction:**

Poor oral health severely impacts an individual's quality of life by altering the ability to perform basic tasks such as eating or talking.<sup>1</sup> Of the diseases that affect the oral cavity, dental caries and periodontal infections are the most prevalent.<sup>2</sup> More than 91% of adults and 58% of adolescents in the US had a caries experience in 2012.<sup>3</sup> Dental caries also disproportionately affects adolescents from low socioeconomic backgrounds.<sup>4</sup> Children affected by dental caries have poor growth, behavioral problems, and poor learning abilities, thus making it imperative to focus preventative efforts towards reducing the risk of dental caries.<sup>5</sup>

Dental caries is known to be caused by a dynamic relationship between microbiota in dental plaque, dietary carbohydrates, the acidity and consistency of saliva, and the cariogenic potential of dental plaque. A shift in the plaque concentrations of mutans streptococci and lactobacilli is one of the primary etiologic factors behind the occurrence of dental caries.<sup>6</sup> Although tooth decay occurs due to biochemical process caused by the demineralization of tooth substance by these bacteria, environmental factors have also been linked to dental caries.<sup>7</sup> Several studies have observed associations of pediatric dental caries with lead and passive tobacco smoking.<sup>8,9</sup> However, the role of other environmental pollutants on oral health has not been adequately studied and is relatively unexplored. Children and adolescents may be more sensitive to the effects of environmental toxicants on their dental health than adults due to their increased exposure to some toxicants, reduced detoxification capacity, or heightened susceptibility to environmental agents.<sup>10</sup>

Perfluoroalkyl acids (PFAAs), are a group of compounds that have been in use for over 60 years and are predominantly used as industrial surfactants, stain repellants, and fire fighting foams.<sup>11</sup> Contaminated drinking water and food are the major routes of exposure, and to a lesser extent, house dust is also a minor source of PFAA exposure.<sup>12,13</sup> Some PFAA have

1  
2 biological half-lives on the order of years in humans, and 95% of the US population from 1999-  
3  
4 2008 had detectable serum PFAA concentrations.<sup>14-16</sup> Due to efforts by the United States  
5  
6 Environmental Protection agency (EPA) and PFAA manufacturers, a steady decline in serum  
7  
8 PFAA concentrations has been observed in the past decade.<sup>17</sup> However, those who reside near  
9  
10 industrial sites that use PFAAs in manufacturing, or military or commercial airports that use  
11  
12 aqueous film forming foam may have elevated PFAA exposures compared to the general  
13  
14 population.<sup>17-20</sup> Prior studies also report that PFAA levels are higher in men than women and  
15  
16 those of higher socioeconomic status.<sup>21</sup>  
17  
18

19  
20         Although there is no direct evidence available for the effect of PFAA on dental caries,  
21  
22 some indirect evidence supports the possibility of an association. In rodent studies, prenatal  
23  
24 PFAA exposure has been linked to adverse skeletal deformities.<sup>22</sup> Moreover, serum  
25  
26 perflurooctanoic acid (PFOA) levels have been associated with a decrease in spinal bone mineral  
27  
28 density in premenopausal women.<sup>23</sup> However, inconsistencies in results were observed when  
29  
30 different bone sites (such as lumbar spine) were assessed and by menopausal status in  
31  
32 women.<sup>24</sup> PFAA are also potential endocrine disrupting chemicals (EDCs), and have been  
33  
34 associated with reduced levels of thyroid hormones, which are necessary for stimulating growth  
35  
36 plates and promoting linear growth, thereby affecting bone metabolism.<sup>24,25</sup> Due to the  
37  
38 similarity in structure, chemical composition, and mineralization processes in both dentin and  
39  
40 bone, it is plausible that PFAAs could play a role in the mineralization of teeth as well.<sup>26,27</sup> In a  
41  
42 recent systematic review by Ballesteros et al., the authors reported consistent positive  
43  
44 associations of maternal and adolescent serum PFAA concentrations with circulating TSH  
45  
46 concentrations in several studies.<sup>28</sup> Prior studies show that thyroid hormones influence the  
47  
48 maturation of teeth and cause early life changes in periodontal tissues.<sup>29</sup> Moreover, children and  
49  
50 adolescents with reduced thyroid hormone levels exhibit enamel hypoplasia, causing the  
51  
52  
53  
54  
55

1  
2 enamel layer of teeth to be thin and deficient, thereby making them more susceptible to  
3  
4 caries.<sup>30</sup> Finally, there is considerable evidence that some PFAA are immunotoxic and exposure  
5  
6 may promote dental caries by suppressing immune responses to cariogenic bacteria.<sup>31,32</sup>  
7  
8

9 Based on this evidence we hypothesized that PFAA exposures would be associated with  
10  
11 tooth demineralization. Our objective was to identify the presence of any relationship between  
12  
13 PFAA exposure and the prevalence of dental caries in adolescents given their potential  
14  
15 heightened susceptibility to environmental chemical exposures.  
16  
17

### 18 **Methods:**

19  
20 *Study Participants:* We used a nationally representative sample of US adolescents aged 12 to 19  
21  
22 years. Data for this study came from the National Health and Nutrition Examination Survey  
23  
24 (NHANES), which recruits non-institutionalized American civilians.<sup>33</sup> The NHANES is a cross-  
25  
26 sectional study which combines interviews and physical examinations of children and adults  
27  
28 living in the United States to assess their health and nutritional status. Data is collected using a  
29  
30 complex, multi-stage probability design with over-sampling of children below the age of 5,  
31  
32 Mexican-Americans, and non-Hispanic blacks. Information regarding interview processes,  
33  
34 examination protocols, and sample collection can be found elsewhere.<sup>34,35</sup>  
35  
36  
37

38 NHANES datasets are released every two years in cycles and we used data collected  
39  
40 between 1999-2012 for our primary analysis. The 2013-2014 cycle data was used for sensitivity  
41  
42 analyses. There were 9,756-10,537 participants in each cycle. We excluded the 2001-2002 cycle  
43  
44 because PFAA were not analyzed in individual serum samples. For our study, 10,856 adolescents  
45  
46 age 12 to 19 years underwent a dental examination in six cycles and we restricted our analysis  
47  
48 to 2,869 who had laboratory measurements for serum PFAA concentrations and complete  
49  
50 covariate data. Approximately equal proportions of adolescents from each cycle contributed to  
51  
52 our analysis.  
53  
54  
55

1  
2  
3 Dental Caries Assessment: A detailed report on the dental examination component of NHANES  
4 has been described in earlier studies.<sup>36,37</sup> Briefly, dental examinations in NHANES were  
5 performed on all participants aged 2 years or older and who did not meet the exclusion criteria  
6 including orofacial pain or specific medical conditions, physical limitations, inability to comply, or  
7 being uncooperative.<sup>38</sup> Visual and tactile examination of the oral cavity were performed by  
8 trained dentists who were licensed in at least one US state. Quality control was ensured by  
9 including procedures such as having trained staff, use of standard examiners, and continuous  
10 checks on inter-examiner reliability and consistency with the standard examiner.  
11  
12  
13  
14  
15  
16  
17  
18  
19

20 Our primary outcome was dental caries prevalence and it was defined as the presence  
21 of decay or a restoration on any tooth surface, or the loss of a tooth following tooth decay. All  
22 the four third molars (tooth numbers 1, 16, 17 and 32) were excluded in our analysis since caries  
23 information for these teeth were not recorded in any of the data cycles. In the data cycles 2005-  
24 2006, 2007-2008 and 2009-2010 the variables *ohxdecay* and *ohxrest* provided information about  
25 the presence of at least one decayed surface or restoration per respondent. For the remaining  
26 data cycles, a more detailed dental examination was conducted by recording the presence of  
27 caries or a restoration on each surface of the tooth. If a tooth had both decay as well a  
28 restoration, only the decay was noted. The total Decayed, Missing or Filled surfaces (DMFS) data  
29 were computed for each participant and the presence of caries was operationalized as having at  
30 least one decay or restoration per respondent to facilitate comparison with the other data  
31 cycles. Normal eruption sequence and the age of the child were considered when evaluating  
32 DMFS for mixed dentition.  
33  
34  
35  
36  
37  
38  
39  
40  
41  
42  
43  
44  
45  
46  
47  
48

49 PFAA exposure: Serum PFAA concentrations were quantified in a random subsample of  
50 approximately one-third of participants age 12-19 years.<sup>39</sup> Serum concentrations of PFOS, PFOA,  
51 perfluorohexane sulfonic acid (PFHxS), perfluorononanoic acid (PFNA), perfluoroheptanoic acid,  
52  
53  
54  
55

1  
2 perfluorooctane sulfonamide, 2-(N-ethyl-perfluorooctane sulfonamide) acetic acid, 2-(N-methyl-  
3 perfluorooctane sulfonamide) acetic acid, perfluorobutane sulfonic acid, perfluorodecanoic acid,  
4 perfluoroundecanoic acid, and perfluorododecanoic acid were quantified in 100 µL of serum  
5 using a modification of the method of Kuklennyik et al (2005).<sup>40</sup> This method uses automated  
6 solid-phase extraction coupled to reversed-phase high-performance liquid chromatography–  
7 tandem mass spectrometry. Since the serum concentrations of PFOA, PFOS, PFNA and PFHxS  
8 were detectable in more than 98% of the survey participants, only these PFAA were included in  
9 our analysis. PFAA below the limit of detection (LOD) were quantified by dividing the LOD by the  
10  $\sqrt{2}$ . Other perfluoroalkyl substances were not considered due to their low detection rate and  
11 lower median concentrations relative to the other four PFAA in our study.

12  
13  
14  
15  
16  
17  
18  
19  
20  
21  
22  
23  
24  
25 Covariates: Several covariates were considered as potential confounders based on their  
26 relationship with both PFAA exposure and dental caries. Demographic variables included the age  
27 of the participant (continuous in years), sex (male vs. female) and race/ethnicity (Mexican  
28 American, Other Hispanic, Non-Hispanic white, Non-Hispanic black, vs Other non-Hispanic race).  
29 We included two measures of family socioeconomic status. First, poverty to income ratio (PIR)  
30 of the child's family, which is the ratio of the family income to the poverty threshold in the year  
31 of the interview, was used to assess household income. Second, we adjusted for the parent or  
32 guardian's education level (less than, equal to and greater than high school level of education)  
33 since lower education may be associated with higher caries prevalence in the child.<sup>41</sup> Serum  
34 cotinine and blood lead levels were also considered as potential confounders due to studies  
35 reporting an association between these exposures and dental caries.<sup>8,42</sup> Whole blood lead and  
36 serum cotinine concentrations were measured for all participants over the age of 1 years using a  
37 previously described laboratory procedure.<sup>43</sup> Though significant contributors to dental caries

1  
2 risk, factors such as oral hygiene practices could not be accounted for since they were not  
3  
4 measured in these NHANES cycles.  
5

6  
7 *Statistical Analysis:* Analyses were performed using SAS survey procedures (SAS Institute Inc.,  
8  
9 version 9.3). To account for the complex NHANES survey design, we used the 2-year sampling  
10  
11 weights, strata, and cluster variables to account for the complex sampling design as  
12  
13 recommended by the National Center for Health Statistics (NCHS).<sup>44</sup>  
14

15  
16 We started our analyses by performing univariate analysis of serum PFAA  
17  
18 concentrations and caries prevalence. Bivariable analysis was then conducted by examining how  
19  
20 caries prevalence and PFAA concentrations varied by covariates. We used logistic regression  
21  
22 with a binary outcome of dental caries to examine the association between PFAA and dental  
23  
24 caries prevalence. Using multivariable logistic regression models, we calculated adjusted  
25  
26 prevalence odds ratios (OR) and 95% CIs for the top three quartiles of PFAA concentrations as  
27  
28 compared to the first. Linear PFAA terms were used to evaluate trends and we estimated the  
29  
30 prevalence OR of caries with each 2-fold (i.e.,  $\log_2$ ) increase in serum PFAA concentrations.  
31  
32

33  
34 We conducted three sets of sensitivity analyses. First, using data from 2003-2012, we  
35  
36 adjusted for the mean total sugar intake (Supplemental table 1).<sup>45</sup> Total dietary sugar intake was  
37  
38 assessed using 24-hour food recalls conducted on two separate days in the study years 2003  
39  
40 through 2012 and was considered as a confounder because dietary sugar has been identified as  
41  
42 one of the primary risk factors for the development of caries. Second, we created a single multi-  
43  
44 pollutant model that included  $\log_2$ -transformed PFOA, PFOS, PFNA and PFHxS concentrations to  
45  
46 determine if associations of one PFAA was confounded by another (supplemental table 2).  
47  
48 Finally, using data from the years 1999-2000, 2002-2003, 2004-2005, 2011-2012 and 2013-2014  
49  
50 that had detailed DMFS scores, we calculated a count ratio of carious surfaces by PFAA  
51  
52 concentration using Poisson regression adjusting for race/ethnicity, age, gender,  
53  
54  
55



parent/guardian education level, family poverty to income ratio (PIR), serum cotinine and blood lead levels (supplemental table 2).

### **Results:**

Of 2,869 participants, 1,644 (59%) experienced one or more dental caries (Table 1). In bivariable analyses, females had a higher prevalence of caries (63%) than males (56%). Mexican Americans had the highest prevalence of dental caries (67%) relative to other races and ethnicities and interestingly, the lowest median serum PFNA concentrations. Adolescents with family PIR below 1.0 (i.e., below the poverty threshold), 63% had one or more dental caries compared to those belonging to the highest category of family PIR (above 1.85, 54%). Dental caries prevalence was inversely related to the education level of the respondent. Higher blood lead and serum cotinine concentrations were associated with higher prevalence of dental caries.

Median (range) serum PFOA, PFOS, PFNA, and PFHxS concentrations were 3.5 ng/ml (0-22), 13 ng/mL (0-116), 0.8 ng/mL (0-6.7), and 1.8ng/mL (0-82), respectively (Table 2). PFOA and PFOS concentrations were in general higher among males and non-Hispanic whites. They were also higher among adolescents from wealthier families and respondents with more education. PFOA and PFOS concentrations were also positively associated with serum cotinine and lead concentrations.

In both unadjusted and adjusted analyses, there was no association of PFOA, PFOS, and PFHxS with dental caries prevalence (Table 3). However, in unadjusted analyses, we observed a trend suggesting an inverse association between PFNA and caries prevalence where the odds of caries were 25% (OR: 0.75; 95% CI: 0.60, 0.94), 28% (OR: 0.72; 95% CI: 0.59, 0.90), and 43% (OR: 0.57; 95% CI: 0.46, 0.71) lower among adolescents in the 2<sup>nd</sup>, 3<sup>rd</sup>, and 4<sup>th</sup> quartiles of serum PFNA concentrations compared to adolescents in the first quartile, respectively (Table 3). After

1  
2 adjusting for potential confounders, the odds of caries were attenuated with increasing PFNA  
3 concentrations, where adolescents in the 2<sup>nd</sup>, 3<sup>rd</sup>, and 4<sup>th</sup> quartiles of serum PFNA  
4 concentrations had 21% (OR: 0.79; 95% CI: 0.63, 1.01), 15% (OR: 0.85; 95% CI: 0.67, 1.08), and  
5 30% (OR: 0.7; 95% CI: 0.55, 0.90) lower odds of caries compared to adolescents in the first  
6 quartile, respectively.  
7  
8  
9  
10  
11  
12

13 In sensitivity analyses adjusting for dietary sugar intake, there was no substantive  
14 change in the association between PFAA concentrations and caries prevalence (Supplemental  
15 Table 1). We observed no meaningful changes when we jointly adjusting for all four PFAA in the  
16 same model (Supplemental Table 1). Though the results were not statistically significant, PFAA  
17 concentrations were generally associated with decreased DMFS counts. (Supplemental Table 2).  
18  
19  
20  
21  
22  
23

#### 24 **Discussion:**

25 Using data from the nationally representative NHANES, we observed no evidence that  
26 serum PFOA, PFOS and PFHxS concentrations were associated with the prevalence of dental  
27 caries in 12-19-year-old US adolescents. However, we observed a trend suggesting a decrease in  
28 the prevalence of caries with increasing serum PFNA concentrations. Our sensitivity analyses did  
29 not elicit any meaningful changes in this association.  
30  
31  
32  
33  
34  
35  
36  
37

38 The null association that we observed of serum PFOA, PFOS, and PFHxS concentrations  
39 with dental caries prevalence could be because of a true null association. However, there are  
40 several other potential explanations. First, we may have not observed an association because  
41 we did not assess PFAA exposure during a susceptible time period of development in relation to  
42 our outcome. For example, prenatal PFAA exposures may be more important in relation to tooth  
43 development given that teeth begin developing around 6 weeks of intrauterine life.<sup>46</sup> Second,  
44 there is the potential for PFAA to have effects on other dental outcomes and these warrant  
45 additional investigation. For instance, we speculate that PFAA may interfere with hormones that  
46  
47  
48  
49  
50  
51  
52  
53  
54  
55

1  
2 affect salivary gland function, which in turn alters salivary rate in the oral cavity. Decreased  
3  
4 salivation leads to dryness in the mouth and poor oral clearance, thereby facilitating caries  
5  
6 formation.<sup>47,48</sup> The quantity and quality of saliva in the mouth is an important factor associated  
7  
8 with caries incidence, and the endocrine disrupting properties of PFAA may have altered the  
9  
10 functioning of salivary glands.<sup>25,49</sup> However, the NHANES does not include direct measures of  
11  
12 salivary gland function, thus limiting our investigation into this outcome.  
13  
14

15  
16 Interestingly, some longer chain PFAA display effects indicative of antibacterial action  
17  
18 against some microorganisms.<sup>32,50</sup> Long chain PFAA have displayed anti-fouling properties and  
19  
20 have shown inhibitory action on the growth of algae and certain strains of bacteria in cell  
21  
22 cultures.<sup>50</sup> This could also explain why PFNA, the longest chain length PFAA we examined,  
23  
24 demonstrated a trend suggesting a protective association against dental caries. We also  
25  
26 speculate that the inverse association between PFNA and dental caries we observed may be due  
27  
28 to the effect of this PFAA on the peroxisome proliferator-activated receptor alpha (PPAR $\alpha$ ).  
29  
30 PPAR $\alpha$  is a transcription factor that regulates the gene expression of enzymes and it has been  
31  
32 shown to have anti-inflammatory properties.<sup>51</sup> In rodent models, PFNA has been found to cause  
33  
34 robust activation of PPARs.<sup>52</sup> Although the four PFAA we examined have similar chemical  
35  
36 structures and properties, the toxicokinetics of each varies with the carbon chain length.<sup>53,54</sup> We  
37  
38 speculate that PFNA, and not PFOA, PFOS, or PFHxS was inversely associated with decreased  
39  
40 dental caries prevalence by causing reduced inflammation as its longer chain length is  
41  
42 associated with more PPAR $\alpha$  agonism compared to PFOA, PFOS, and PFHxS.<sup>52,55,56</sup> However, it is  
43  
44 also possible that the protective associations we observed for PFNA are due to confounding by  
45  
46 factors that could not be assessed in to our study, including tooth brushing habits, use of  
47  
48 fluoridated toothpastes, and presence of dental sealants. Indeed, our adjusted results were  
49  
50 attenuated towards the null compare to unadjusted results and further adjustments for residual  
51  
52  
53  
54  
55

13

1  
2 confounding could completely attenuate the observed association between serum PFNA  
3  
4 concentration and caries prevalence. Although they did not reach significance, our sensitivity  
5  
6 analyses also showed a trend towards an inverse association between serum PFNA  
7  
8 concentrations and caries prevalence.  
9

10  
11 To the best of our knowledge, this is the first epidemiologic study that examined the  
12  
13 relationship between PFAA exposure and dental caries prevalence amongst adolescents. The  
14  
15 strengths of our study include the large sample size and nationally representative nature of the  
16  
17 NHANES. In addition, we were able to adjust for several important covariates that are associated  
18  
19 with the prevalence of dental caries and PFAA concentrations, thereby improving the strength  
20  
21 of our inferences. Though our study adjusted for numerous potential confounders, it is possible  
22  
23 that our results may have been confounded by misclassified or unmeasured covariates. For  
24  
25 instance, we were unable to adjust for the presence of dental sealants or use of fluoridated  
26  
27 water; these may be confounders due to their protective effect on teeth and potential  
28  
29 association with PFAA or factors associated with PFAA exposure. Patents show that some  
30  
31 perfluorinated compounds containing 7-8 carbon atoms are used in toothpastes to increase  
32  
33 fluoride-enamel interactions.<sup>57</sup> Thus, individuals who brush more could have higher PFAA  
34  
35 exposure and lower caries, which might explain the inverse association we observed. However,  
36  
37 we could not adjust for variables associated with dental hygiene such as tooth brushing habits  
38  
39 or use of fluoridated toothpastes since they were not assessed in the data cycles we examined.  
40  
41  
42  
43  
44

45 We were also unable to assess earlier childhood exposure to PFAA since serum PFAA  
46  
47 concentrations were only measured in children ages 12 years and older. Another limitation in  
48  
49 our study is that we could not classify specific types of caries due to lack of tooth specific data in  
50  
51 some NHANES cycles. Critically, establishing temporality is a concern in cross-sectional studies  
52  
53 like this one, as we cannot determine the sequence of occurrence of PFAA exposure and caries  
54  
55

1  
2 development. Moreover, because we used serum PFAA concentrations to assess PFAA exposure,  
3  
4 any physiologic process that influences the excretion of PFAA and caries risk could have  
5  
6 confounded the association between PFAA and caries prevalence.  
7  
8

9 We observed no evidence suggesting an association between PFAA exposure and dental  
10  
11 caries prevalence, despite prior studies showing that PFAA is associated with reduced bone  
12  
13 mineral density and has actions as an endocrine disrupting compound and immunotoxicant.  
14  
15 Future studies may try to confirm the relationship between PFNA concentrations and decreased  
16  
17 dental caries prevalence, while adjusting for additional confounding factors that we were unable  
18  
19 to assess in our study. Though dental caries is preventable, its prevalence has remained  
20  
21 relatively stable for the past decade in the United States.<sup>58</sup> Environmental factors are  
22  
23 overlooked risk factors in the study of oral diseases, despite knowledge of the effects of  
24  
25 toxicants such as tetracycline and minocycline on odontogenesis for decades.<sup>59</sup> Therefore,  
26  
27 future research should consider identifying the potential effect of other environmental toxicants  
28  
29 on oral health.  
30  
31  
32  
33  
34  
35  
36  
37  
38  
39  
40  
41  
42  
43  
44  
45  
46  
47  
48  
49  
50  
51  
52  
53  
54  
55  
56  
57  
58  
59  
60

1  
2  
3 Acknowledgments:  
4

5 We would like to thank the data collection team and NHANES administration and staff  
6 for the reports made available through the NHANES website that greatly assisted us in  
7 the generation of this paper.  
8  
9  
10  
11  
12  
13  
14  
15  
16  
17  
18  
19  
20  
21  
22  
23  
24  
25  
26  
27  
28  
29  
30  
31  
32  
33  
34  
35  
36  
37  
38  
39  
40  
41  
42  
43  
44  
45  
46  
47  
48  
49  
50  
51  
52  
53  
54  
55  
56  
57  
58  
59  
60

For peer review only

**List of Abbreviations:**

CI: Confidence Interval

DMFS: Decayed, Missing or Filled Surfaces

EDCs: Endocrine Disrupting Chemicals

NCHS: National Center for Health Statistics

NHANES: National Health and Nutrition Examination Survey

OR: Odds Ratio

PFAA: Perfluorinated Alkyl Acids

PFAS: Per- and polyfluoroalkyl Substances

PFHxS: Perfluorohexane Sulfonic Acid

PFNA: Perfluorononanoic Acid

PFOA: Perfluorooctanoic Acid

PFOS: Perfluorooctane Sulfonic Acid

PIR: Poverty to Income Ratio

PPAR $\alpha$ : Peroxisome Proliferator-Activated Receptor alpha

1  
2  
3 **Declarations:**

4 **Ethics approval and consent to participate:**

5 Not applicable

6  
7  
8 **Data statement:**

9 All the datasets used are freely available from the NHANES website public archive, accessible at  
10  
11 NHANES Questionnaires, Datasets, and Related Documentation repository,  
12  
13 [https://wwwn.cdc.gov/nchs/nhanes/Default.aspx].  
14  
15

16  
17 **Funding Statement:**

18 A National Institutes of Environmental Health Sciences grant funded the effort of JMB (ES  
19  
20 024381).  
21  
22

23 **Competing interests:**

24 The authors declare that they have no competing interests.  
25  
26

27 **Author Contributions:**

28 NR and JB were involved in study design, analysis and write up. NR was responsible for literature  
29  
30 search, preliminary analysis and initial draft. NR, MA and JB were responsible for data  
31  
32 interpretation, and have read and approved the final manuscript.  
33  
34  
35  
36  
37  
38  
39  
40  
41  
42  
43  
44  
45  
46  
47  
48  
49  
50  
51  
52  
53  
54  
55  
56  
57  
58  
59  
60



**References:**

1. Brennan DS, Spencer AJ, Roberts-Thomson KF. Tooth loss, chewing ability and quality of life. *Qual Life Res Int J Qual Life Asp Treat Care Rehabil* 2008;17(2):227–35.
2. Dye BA, Tan S, Smith V, et al. Trends in oral health status: United States, 1988-1994 and 1999-2004. *Vital Health Stat* 11 2007;(248):1–92.
3. Products - Data Briefs - Number 96 - May 2012 [Internet]. [cited 2018 Oct 29]; Available from: <https://www.cdc.gov/nchs/products/databriefs/db96.htm>
4. Reisine ST, Psoter W. Socioeconomic status and selected behavioral determinants as risk factors for dental caries. *J Dent Educ* 2001;65(10):1009–16.
5. Tinanoff N, Reisine S. Update on early childhood caries since the Surgeon General's Report. *Acad Pediatr* 2009;9(6):396–403.
6. van Houte J. Role of Micro-organisms in Caries Etiology. *J Dent Res* 1994;73(3):672–81.
7. Arora M, Weuve J, Schwartz J, Wright RO. Association of environmental cadmium exposure with pediatric dental caries. *Environ Health Perspect* 2008;116(6):821–5.
8. Arora M, Weuve J, Weisskopf MG, et al. Cumulative Lead Exposure and Tooth Loss in Men: The Normative Aging Study. *Environ Health Perspect* 2009;117(10):1531–4.
9. Aligne CA, Moss ME, Auinger P, Weitzman M. Association of pediatric dental caries with passive smoking. *JAMA* 2003;289(10):1258–64.
10. Heffernan AL, Hare DJ. Tracing Environmental Exposure from Neurodevelopment to Neurodegeneration. *Trends Neurosci* 2018;41(8):496–501.
11. US EPA O. Basic Information on PFAS [Internet]. US EPA. 2016 [cited 2018 Oct 29]; Available from: <https://www.epa.gov/pfas/basic-information-pfas>
12. Skutlarek D, Exner M, Färber H. Perfluorinated surfactants in surface and drinking waters. *Environ Sci Pollut Res Int* 2006;13(5):299–307.
13. Brendel S, Fetter É, Staude C, Vierke L, Biegel-Engler A. Short-chain perfluoroalkyl acids: environmental concerns and a regulatory strategy under REACH. *Environ Sci Eur* [Internet] 2018 [cited 2018 Oct 29];30(1). Available from: <https://www.ncbi.nlm.nih.gov/pmc/articles/PMC5834591/>
14. Calafat AM, Wong L-Y, Kuklennyik Z, Reidy JA, Needham LL. Polyfluoroalkyl Chemicals in the U.S. Population: Data from the National Health and Nutrition Examination Survey (NHANES) 2003–2004 and Comparisons with NHANES 1999–2000. *Environ Health Perspect* 2007;115(11):1596–602.

15. Kato K, Wong L-Y, Jia LT, Kuklennyik Z, Calafat AM. Trends in exposure to polyfluoroalkyl chemicals in the U.S. Population: 1999-2008. *Environ Sci Technol* 2011;45(19):8037-45.
16. Olsen GW, Burris JM, Ehresman DJ, et al. Half-life of serum elimination of perfluorooctanesulfonate, perfluorohexanesulfonate, and perfluorooctanoate in retired fluorochemical production workers. *Environ Health Perspect* 2007;115(9):1298-305.
17. Olsen GW, Mair DC, Lange CC, et al. Per- and polyfluoroalkyl substances (PFAS) in American Red Cross adult blood donors, 2000-2015. *Environ Res* 2017;157:87-95.
18. Frisbee SJ, Brooks Jr. AP, Maher A, et al. The C8 health project: Design, methods, and participants. *Environ Health Perspect* 2009;117(12):1873-82.
19. Place BJ, Field JA. Identification of novel fluorochemicals in aqueous film-forming foams used by the US military. *Environ Sci Technol* 2012;46(13):7120-7.
20. Weiss HE. The intergenerational transmission of social capital: A developmental approach to adolescent social capital formation. *Sociol Inq* 2012;82(2):212-35.
21. Betts KS. PERFLUOROALKYL ACIDS: What Is the Evidence Telling Us? *Environ Health Perspect* 2007;115(5):A250-6.
22. Koskela A, Finnilä MA, Korkalainen M, et al. Effects of developmental exposure to perfluorooctanoic acid (PFOA) on long bone morphology and bone cell differentiation. *Toxicol Appl Pharmacol* 2016;301:14-21.
23. Khalil N, Chen A, Lee M, et al. Association of Perfluoroalkyl Substances, Bone Mineral Density, and Osteoporosis in the U.S. Population in NHANES 2009-2010. *Environ Health Perspect* 2016;124(1):81-7.
24. Lin L-Y, Wen L-L, Su T-C, Chen P-C, Lin C-Y. Negative association between serum perfluorooctane sulfate concentration and bone mineral density in US premenopausal women: NHANES, 2005-2008. *J Clin Endocrinol Metab* 2014;99(6):2173-80.
25. White SS, Fenton SE, Hines EP. Endocrine disrupting properties of perfluorooctanoic acid. *J Steroid Biochem Mol Biol* 2011;127(1-2):16-26.
26. Kim J-Y, Kim M-R, Kim S-J. Modulation of osteoblastic/odontoblastic differentiation of adult mesenchymal stem cells through gene introduction: a brief review. *J Korean Assoc Oral Maxillofac Surg* 2013;39(2):55-62.
27. Opsahl Vital S, Gaucher C, Bardet C, et al. Tooth dentin defects reflect genetic disorders affecting bone mineralization. *Bone* 2012;50(4):989-97.
28. Ballesteros V, Costa O, Iñiguez C, Fletcher T, Ballester F, Lopez-Espinosa M-J. Exposure to perfluoroalkyl substances and thyroid function in pregnant women and children: A systematic review of epidemiologic studies. *Environ Int* 2017;99:15-28.

- 1
  - 2
  - 3
  - 4
  - 5
  - 6
  - 7
  - 8
  - 9
  - 10
  - 11
  - 12
  - 13
  - 14
  - 15
  - 16
  - 17
  - 18
  - 19
  - 20
  - 21
  - 22
  - 23
  - 24
  - 25
  - 26
  - 27
  - 28
  - 29
  - 30
  - 31
  - 32
  - 33
  - 34
  - 35
  - 36
  - 37
  - 38
  - 39
  - 40
  - 41
  - 42
  - 43
  - 44
  - 45
  - 46
  - 47
  - 48
  - 49
  - 50
  - 51
  - 52
  - 53
  - 54
  - 55
  - 56
  - 57
  - 58
  - 59
  - 60
29. Beriashvili S, Nikolaishvili M, Mantskava M, Momtsemlidze N, Franchuk K. CHANGES IN TOOTH HARD TISSUE MINERALIZATION AND BLOOD RHEOLOGY IN HEALTHY ADOLESCENTS AND THOSE WITH THYROID DYSFUNCTION. *Georgian Med News* 2016;(Issue):28–34.
30. Vucic S, Korevaar TIM, Dharmo B, et al. Thyroid Function during Early Life and Dental Development. *J Dent Res* 2017;96(9):1020–6.
31. Immunotoxicity Associated with Exposure to Perfluorooctanoic Acid (PFOA) or Perfluorooctane Sulfonate (PFOS) [Internet]. [cited 2018 Oct 29]; Available from: <https://ntp.niehs.nih.gov/pubhealth/hat/noms/pfoa/index.html>
32. Hekster FM, Laane RWPM, de Voogt P. Environmental and toxicity effects of perfluoroalkylated substances. *Rev Environ Contam Toxicol* 2003;179:99–121.
33. NHANES - National Health and Nutrition Examination Survey Homepage [Internet]. 2018 [cited 2018 Oct 29]; Available from: <https://www.cdc.gov/nchs/nhanes/index.htm>
34. Dye BA, Barker LK, Selwitz RH, et al. Overview and quality assurance for the National Health and Nutrition Examination Survey (NHANES) oral health component, 1999–2002. *Community Dent Oral Epidemiol* 2007;35(2):140–51.
35. NHANES Survey Methods and Analytic Guidelines [Internet]. [cited 2018 Oct 29]; Available from: <https://wwwn.cdc.gov/nchs/nhanes/analyticguidelines.aspx>
36. Dye BA, Li X, Lewis BG, Iafolla T, Beltran-Aguilar ED, Eke PI. Overview and quality assurance for the oral health component of the National Health and Nutrition Examination Survey (NHANES), 2009–2010. *J Public Health Dent* 2014;74(3):248–56.
37. NHANES 2011–2012: Oral Health Data Documentation, Codebook, and Frequencies [Internet]. [cited 2018 Oct 29]; Available from: [https://wwwn.cdc.gov/Nchs/Nhanes/2011-2012/OHQ\\_G.htm](https://wwwn.cdc.gov/Nchs/Nhanes/2011-2012/OHQ_G.htm)
38. NHANES 2013–2014: Oral Health - Recommendation of Care Data Documentation, Codebook, and Frequencies [Internet]. [cited 2018 Oct 29]; Available from: [https://wwwn.cdc.gov/Nchs/Nhanes/2013-2014/OHXREF\\_H.htm](https://wwwn.cdc.gov/Nchs/Nhanes/2013-2014/OHXREF_H.htm)
39. NHANES 2011–2012: Polyfluoroalkyl Chemicals Data Documentation, Codebook, and Frequencies [Internet]. [cited 2018 Oct 29]; Available from: [https://wwwn.cdc.gov/Nchs/Nhanes/2011-2012/PFC\\_G.htm](https://wwwn.cdc.gov/Nchs/Nhanes/2011-2012/PFC_G.htm)
40. Kuklennyik Z, Needham LL, Calafat AM. Measurement of 18 perfluorinated organic acids and amides in human serum using on-line solid-phase extraction. *Anal Chem* 2005;77(18):6085–91.
41. Ju X, Jamieson LM, Mejia GC. Estimating the effects of maternal education on child dental caries using marginal structural models: The Longitudinal Study of Indigenous Australian Children. *Community Dent Oral Epidemiol* 2016;44(6):602–10.

- 1
  - 2
  - 3
  - 4
  - 5
  - 6
  - 7
  - 8
  - 9
  - 10
  - 11
  - 12
  - 13
  - 14
  - 15
  - 16
  - 17
  - 18
  - 19
  - 20
  - 21
  - 22
  - 23
  - 24
  - 25
  - 26
  - 27
  - 28
  - 29
  - 30
  - 31
  - 32
  - 33
  - 34
  - 35
  - 36
  - 37
  - 38
  - 39
  - 40
  - 41
  - 42
  - 43
  - 44
  - 45
  - 46
  - 47
  - 48
  - 49
  - 50
  - 51
  - 52
  - 53
  - 54
  - 55
  - 56
  - 57
  - 58
  - 59
  - 60
42. Iida H, Kumar JV, Kopycka-Kedzierawski DT, Billings RJ. Effect of tobacco smoke on the oral health of U.S. women of childbearing age. *J Public Health Dent* 2009;69(4):231–41.
43. NHANES 2011-2012 Laboratory Data [Internet]. [cited 2018 Oct 29]; Available from: <https://wwwn.cdc.gov/nchs/nhanes/search/datapage.aspx?Component=Laboratory&CycleBeginYear=2011>
44. NHANES - Continuous NHANES Web Tutorial - Specifying Weighting Parameters [Internet]. [cited 2018 Oct 29]; Available from: <https://www.cdc.gov/nchs/tutorials/nhanes/SurveyDesign/Weighting/intro.htm>
45. Rosinger A, Herrick K, Gahche J, Park S. Sugar-sweetened Beverage Consumption Among U.S. Adults, 2011-2014. *NCHS Data Brief* 2017;(270):1–8.
46. Review of MEDICAL EMBRYOLOGY Book by BEN PANSKY, Ph.D, M.D. - LifeMap Discovery [Internet]. [cited 2018 Oct 29]; Available from: <https://discovery.lifemapsc.com/library/review-of-medical-embryology>
47. Cunha-Cruz J, Scott J, Rothen M, et al. Salivary characteristics and dental caries: evidence from general dental practices. *J Am Dent Assoc* 1939 2013;144(5):e31-40.
48. Lukacs JR, Largaespada LL. Explaining sex differences in dental caries prevalence: saliva, hormones, and “life-history” etiologies. *Am J Hum Biol Off J Hum Biol Council* 2006;18(4):540–55.
49. Pedersen AML, Bardow A, Nauntofte B. Salivary changes and dental caries as potential oral markers of autoimmune salivary gland dysfunction in primary Sjögren’s syndrome. *BMC Clin Pathol* 2005;5:4.
50. Rosal R, Rodea-Palomares I, Boltes K, Fernández-Piñas F, Leganés F, Petre A. Ecotoxicological assessment of surfactants in the aquatic environment: combined toxicity of docusate sodium with chlorinated pollutants. *Chemosphere* 2010;81(2):288–93.
51. Devchand PR, Keller H, Peters JM, Vazquez M, Gonzalez FJ, Wahli W. The PPARalpha-leukotriene B4 pathway to inflammation control. *Nature* 1996;384(6604):39–43.
52. Das KP, Grey BE, Rosen MB, et al. Developmental toxicity of perfluorononanoic acid in mice. *Reprod Toxicol Elmsford N* 2015;51:133–44.
53. Jantzen CE, Annunziato KA, Bugel SM, Cooper KR. PFOS, PFNA, and PFOA sub-lethal exposure to embryonic zebrafish have different toxicity profiles in terms of morphometrics, behavior and gene expression. *Aquat Toxicol Amst Neth* 2016;175:160–70.
54. Buck RC, Franklin J, Berger U, et al. Perfluoroalkyl and polyfluoroalkyl substances in the environment: terminology, classification, and origins. *Integr Environ Assess Manag* 2011;7(4):513–41.



**Table 1: Descriptive characteristics, caries prevalence, and perfluoroalkyl substance concentrations (ng/mL) by sociodemographic, environmental, and health factors of 2,869 age 12 to 19-year-old US adolescents. (NHANES 1999-2012)**

| Covariates                               | N (%) with<br>>1 caries | PFOA<br>Median (25 <sup>th</sup> ,<br>75 <sup>th</sup> ) | PFOS Median<br>(25 <sup>th</sup> , 75 <sup>th</sup> ) | PFNA<br>Median (25 <sup>th</sup> ,<br>75 <sup>th</sup> ) | PFHxS Median<br>(25 <sup>th</sup> , 75 <sup>th</sup> ) |
|------------------------------------------|-------------------------|----------------------------------------------------------|-------------------------------------------------------|----------------------------------------------------------|--------------------------------------------------------|
| <b>Overall</b>                           | 1644 (59)               | 3.1 (2.1, 4.4)                                           | 11.0 (5.9, 17)                                        | 0.9 (0.6, 1.2)                                           | 1.7 (0.9, 3.6)                                         |
| <b>Sex</b>                               |                         |                                                          |                                                       |                                                          |                                                        |
| Male                                     | 824(56)                 | 4.0 (2.7, 5.5)                                           | 15.0 (8, 25)                                          | 1.0 (0.6, 1.3)                                           | 2.1 (1.1, 4.2)                                         |
| Female                                   | 820(63)                 | 3.1 (2.1, 4.4)                                           | 12.0 (6.7, 20)                                        | 0.7 (0.5, 1.1)                                           | 1.5 (0.8, 3)                                           |
| <b>Race</b>                              |                         |                                                          |                                                       |                                                          |                                                        |
| Mexican American                         | 591(67)                 | 3.2 (2.2, 4.6)                                           | 12.0 (6.8, 20)                                        | 0.6 (0.4, 1)                                             | 1.4 (0.8, 2.8)                                         |
| Other Hispanic                           | 118 (60)                | 3.1 (2.2, 4.7)                                           | 8.0 (4.6, 16)                                         | 0.9 (0.6, 1.3)                                           | 1.1 (0.6, 2.3)                                         |
| Non-Hispanic white                       | 408 (57)                | 3.9 (2.7, 5.3)                                           | 15.0 (8.5, 25)                                        | 0.9 (0.6, 1.3)                                           | 2.6 (1.3, 5.1)                                         |
| Non-Hispanic black                       | 429 (53)                | 3.6 (2.3, 5.2)                                           | 15.0 (8.7, 25)                                        | 0.9 (0.6, 1.2)                                           | 2.0 (1.1, 3.9)                                         |
| Other non-Hispanic<br>race               | 98 (58)                 | 2.7 (2, 4.1)                                             | 9.5 (4.9, 19)                                         | 0.9 (0.6, 1.2)                                           | 1.6 (0.7, 3.3)                                         |
| <b>Age</b>                               |                         |                                                          |                                                       |                                                          |                                                        |
| 12                                       | 164 (48)                | 3.7 (2.5, 5.0)                                           | 14.0 (7.1, 26)                                        | 0.8 (0.5, 1.2)                                           | 2.0 (1.1, 4.3)                                         |
| 13                                       | 187 (50)                | 3.4 (2.3, 5.0)                                           | 13.0 (5.9, 23)                                        | 0.8 (0.5, 1.2)                                           | 1.7 (0.9, 3.6)                                         |
| 14                                       | 200 (58)                | 3.2 (2.3, 4.5)                                           | 12.0 (6.8, 22)                                        | 0.9 (0.6, 1.2)                                           | 1.8 (1.0, 3.4)                                         |
| 15                                       | 187 (58)                | 3.2 (2.3, 4.7)                                           | 14.0 (7.3, 21)                                        | 0.8 (0.5, 1.1)                                           | 2.0 (0.9, 3.6)                                         |
| 16                                       | 207 (60)                | 3.6 (2.3, 5.0)                                           | 13.0 (7.4, 23)                                        | 0.7 (0.5, 1.2)                                           | 1.9 (0.9, 3.7)                                         |
| 17                                       | 218 (65)                | 3.8 (2.5, 5.3)                                           | 14.0 (8.2, 24)                                        | 0.8 (0.6, 1.3)                                           | 1.8 (1.0, 3.9)                                         |
| 18                                       | 255 (70)                | 3.4 (2.3, 5.2)                                           | 14.0 (8.1, 22)                                        | 0.8 (0.5, 1.1)                                           | 1.6 (0.8, 3.6)                                         |
| 19                                       | 226 (67)                | 3.4 (2.3, 5.1)                                           | 13.0 (7.3, 22)                                        | 0.8 (0.6, 1.2)                                           | 1.7 (0.9, 3.6)                                         |
| <b>Family PIR</b>                        |                         |                                                          |                                                       |                                                          |                                                        |
| <1                                       | 668 (63)                | 3.2 (2.2, 4.7)                                           | 12 (6.2, 20)                                          | 0.8 (0.5, 1.1)                                           | 1.6 (0.8, 3.1)                                         |
| 1-1.85                                   | 388 (62)                | 3.4 (2.3, 4.9)                                           | 14 (7.0, 22)                                          | 0.8 (0.5, 1.2)                                           | 1.8 (0.9, 3.6)                                         |
| >1.85                                    | 588 (54)                | 3.8 (2.6, 5.3)                                           | 15 (8.7, 25)                                          | 0.9 (0.6, 1.3)                                           | 2.1 (1.1, 4.3)                                         |
| <b>Education level of<br/>respondent</b> |                         |                                                          |                                                       |                                                          |                                                        |
| < High school                            | 593 (63)                | 3.3 (2.3, 4.7)                                           | 12.0 (6.8, 20)                                        | 0.7 (0.4, 1.1)                                           | 1.4 (0.8, 2.9)                                         |
| High school                              | 403 (61)                | 3.6 (2.3, 5.1)                                           | 14.0 (7.4, 24)                                        | 0.8 (0.6, 1.2)                                           | 1.9 (1.0, 3.7)                                         |
| > High school                            | 576 (55)                | 3.7 (2.5, 5.2)                                           | 14.0 (7.5, 24)                                        | 0.9 (0.6, 1.2)                                           | 2.2 (1.1, 4.5)                                         |
| <b>Serum cotinine<br/>(ng/ml)</b>        |                         |                                                          |                                                       |                                                          |                                                        |
| <0.05                                    | 651 (55)                | 3.4 (2.3, 4.9)                                           | 14.0 (7.6, 23)                                        | 0.8 (0.5, 1.2)                                           | 1.7 (0.9, 3.6)                                         |
| 0.05 to ≤ 3                              | 690 (60)                | 3.5 (2.3, 4.9)                                           | 12.0 (6.9, 23)                                        | 0.8 (0.5, 1.2)                                           | 1.9 (1.0, 3.7)                                         |
| >3                                       | 303 (70)                | 3.8 (2.5, 5.5)                                           | 13.0 (7.2, 21)                                        | 0.8 (0.6, 1.2)                                           | 2.0 (1.1, 4.4)                                         |
| <b>Blood Lead (µg/dL)</b>                |                         |                                                          |                                                       |                                                          |                                                        |
| <0.69                                    | 537 (57)                | 2.8 (1.9, 4.2)                                           | 9.7 (5.2, 17)                                         | 0.8 (0.6, 1.2)                                           | 1.7 (0.8, 3.3)                                         |
| 0.7 to 1.10                              | 544 (59)                | 3.7 (2.5, 5.2)                                           | 14.0 (8.4, 23)                                        | 0.9 (0.6, 1.3)                                           | 1.9 (1.0, 3.9)                                         |
| >1.11                                    | 563 (62)                | 4.0 (2.8, 5.6)                                           | 16.0 (9.5, 26)                                        | 0.7 (0.4, 1.1)                                           | 2.0 (1.0, 4.0)                                         |

**Table 2: Univariate statistics of PFAA concentrations among 2,869 age 12 to 19-year-old US adolescents. (NHANES 1999-2012)**

| Variable | Min  | 25  | Median | 75  | Max |
|----------|------|-----|--------|-----|-----|
| PFOA     | <0.1 | 2.3 | 3.5    | 4.9 | 22  |
| PFOS     | 0.3  | 7.2 | 13     | 22  | 116 |
| PFNA     | <0.1 | 0.5 | 0.8    | 1.2 | 6.7 |
| PFHxS    | <0.1 | 0.9 | 1.8    | 3.7 | 82  |

For peer review only

**Table 3: Unadjusted and adjusted prevalence odds ratio of caries by perfluoroalkyl substance concentrations among age 12 to 19-year-old US adolescents (NHANES 1999-2012)**

| PFAA Quartile (range, ng/mL) | N caries (%) | Unadjusted OR (95% CI) | Adjusted OR (95% CI) <sup>a</sup> |
|------------------------------|--------------|------------------------|-----------------------------------|
| <b>PFOA</b>                  |              |                        |                                   |
| 0.0-2.3                      | 427 (62)     | Ref                    | Ref                               |
| 2.4-3.5                      | 400 (58)     | 0.85 (0.69, 1.06)      | 0.95 (0.74, 1.20)                 |
| 3.6-4.9                      | 410 (59)     | 0.87 (0.70, 1.05)      | 1.04 (0.82, 1.32)                 |
| 5.0-22                       | 407 (59)     | 0.86 (0.69, 1.06)      | 0.95 (0.74, 1.21)                 |
| Log <sub>2</sub> PFOA        | N/A          | 0.95 (0.87, 1.04)      | 1.00 (0.91, 1.12)                 |
| <b>PFOS</b>                  |              |                        |                                   |
| 0.0-7.2                      | 421 (61)     | Ref                    | Ref                               |
| 7.3-13                       | 399 (58)     | 0.91 (0.73, 1.12)      | 0.91 (0.72, 1.16)                 |
| 14-22                        | 421 (61)     | 1.01 (0.81, 1.25)      | 1.02 (0.81, 1.31)                 |
| 23-116                       | 403 (58)     | 0.87 (0.71, 1.09)      | 0.92 (0.72, 1.17)                 |
| Log <sub>2</sub> PFOS        | N/A          | 0.97 (0.91, 1.04)      | 0.99 (0.92, 1.07)                 |
| <b>PFNA</b>                  |              |                        |                                   |
| 0.0-0.5                      | 467 (66)     | Ref                    | Ref                               |
| 0.6-0.8                      | 422 (60)     | 0.75 (0.60, 0.94)      | 0.79 (0.63, 1.01)                 |
| 0.9-1.2                      | 407 (59)     | 0.72 (0.59, 0.90)      | 0.85 (0.67, 1.08)                 |
| 1.3-6.7                      | 348 (53)     | 0.57 (0.46, 0.71)      | 0.70 (0.55, 0.90)                 |
| Log <sub>2</sub> PFNA        | N/A          | 0.85 (0.78, 0.91)      | 0.93 (0.85, 1.01)                 |
| <b>PFHxS</b>                 |              |                        |                                   |
| 0.0-0.9                      | 440 (64)     | Ref                    | Ref                               |
| 1.0-1.8                      | 418 (59)     | 0.82 (0.66, 1.02)      | 0.87 (0.68, 1.10)                 |
| 1.9-3.7                      | 372 (54)     | 0.67 (0.54, 0.83)      | 0.78 (0.61, 0.99)                 |
| 3.8-82                       | 414 (60)     | 0.84 (0.68, 1.05)      | 1.04 (0.81, 1.33)                 |
| Log <sub>2</sub> PFHxS       | N/A          | 0.95 (0.90, 1.00)      | 1.00 (0.94, 1.05)                 |

a-Adjusted for: Adolescents' gender, race (Mexican American, other Hispanic, non-Hispanic white, non-Hispanic black, other non-Hispanic race), education level of the parent/guardian (<12; 12; some college education), Family PIR (<1, 1-1.85, >1.85), blood lead, and serum cotinine levels.



**Supplemental Tables:****Supplemental Table 1: Adjusted prevalence odds ratio of caries by perfluoroalkyl substance concentrations among age 12 to 19-year-old US adolescents (2003-2012): Sensitivity analyses adjusting for dietary sugar intake and multi-pollutant model of serum PFAA concentrations.**

| PFAA  | Adjusted Model 1 <sup>a</sup> | Adjusted-Model 2 <sup>b</sup> | Adjusted-Model 3 <sup>c</sup> |
|-------|-------------------------------|-------------------------------|-------------------------------|
| PFOA  | 0.95 (0.87, 1.04)             | 0.94 (0.84, 1.06)             | 0.93 (0.83, 1.05)             |
| PFOS  | 0.93 (0.85, 1.01)             | 0.92 (0.85, 1.00)             | 0.92 (0.85, 1.02)             |
| PFNA  | 0.95 (0.85, 1.05)             | 0.95 (0.85, 1.05)             | 0.95 (0.85, 1.05)             |
| PFHxS | 0.95 (0.90, 0.99)             | 0.96 (0.90, 1.02)             | 0.96 (0.90, 1.02)             |

<sup>a</sup> Adjusted for: Adolescent's Age, Gender, Race (Mexican American, other Hispanic, non-Hispanic white, non-Hispanic black, other non-Hispanic race), Education level of the parent/guardian (<12; 12; some college education), Family PIR (<1, 1-1.85, >1.85), blood lead, and serum cotinine levels.

<sup>b</sup> Adjusted for: Adolescent's Age, Gender, Race (Mexican American, other Hispanic, non-Hispanic white, non-Hispanic black, other non-Hispanic race), Education level of the parent/guardian (<12; 12; some college education), Family PIR (<1, 1-1.85, >1.85), log transformed PFOA concentration, log transformed PFOS concentration, log transformed PFNA concentration, log transformed PFHxS concentration, blood lead, and serum cotinine levels.

<sup>c</sup> Adjusted for: Dietary sugar intake, Adolescent's Age, Gender, Race (Mexican American, other Hispanic, non-Hispanic white, non-Hispanic black, other non-Hispanic race), Education level of the parent/guardian (<12; 12; some college education), Family PIR (<1, 1-1.85, >1.85), blood lead, and serum cotinine levels

**Supplemental Table 2: Sensitivity analysis of count ratios of surface level dental caries by log<sub>2</sub> transformed PFAA concentrations among age 12 to 19-year-old US adolescents (NHANES 1999-2014)**

| PFAA  | Count Ratio <sup>a</sup> | 95% CI <sup>a</sup> |
|-------|--------------------------|---------------------|
| PFOA  | 0.990                    | 0.989-0.990         |
| PFOS  | 0.948                    | 0.947-0.948         |
| PFNA  | 0.985                    | 0.984-0.985         |
| PFHxS | 0.974                    | 0.973-0.974         |

<sup>a</sup> Adjusted for: Adolescent's Age, Gender, Race (Mexican American, other Hispanic, non-Hispanic white, non-Hispanic black, other non-Hispanic race), Education level of the parent/guardian (<12; 12; some college education), Family PIR (<1, 1-1.85, >1.85), blood lead, and serum cotinine levels.

# Reporting checklist for cross sectional study.

Based on the STROBE cross sectional guidelines.

## Instructions to authors

Complete this checklist by entering the page numbers from your manuscript where readers will find each of the items listed below.

Your article may not currently address all the items on the checklist. Please modify your text to include the missing information. If you are certain that an item does not apply, please write "n/a" and provide a short explanation.

Upload your completed checklist as an extra file when you submit to a journal.

In your methods section, say that you used the STROBE cross sectional reporting guidelines, and cite them as:

von Elm E, Altman DG, Egger M, Pocock SJ, Gotsche PC, Vandembroucke JP. The Strengthening the Reporting of Observational Studies in Epidemiology (STROBE) Statement: guidelines for reporting observational studies.

|                        |     | Reporting Item                                                                                                                  | Page Number |
|------------------------|-----|---------------------------------------------------------------------------------------------------------------------------------|-------------|
| Title                  | #1a | Indicate the study's design with a commonly used term in the title or the abstract                                              | 1           |
| Abstract               | #1b | Provide in the abstract an informative and balanced summary of what was done and what was found                                 | 2           |
| Background / rationale | #2  | Explain the scientific background and rationale for the investigation being reported                                            | 3           |
| Objectives             | #3  | State specific objectives, including any prespecified hypotheses                                                                | 3           |
| Study design           | #4  | Present key elements of study design early in the paper                                                                         | 2, 6        |
| Setting                | #5  | Describe the setting, locations, and relevant dates, including periods of recruitment, exposure, follow-up, and data collection | 6           |
| Eligibility criteria   | #6a | Give the eligibility criteria, and the sources and methods of selection of participants.                                        | 7           |

|    |                  |      |                                                                   |     |
|----|------------------|------|-------------------------------------------------------------------|-----|
| 1  |                  | #7   | Clearly define all outcomes, exposures, predictors, potential     | 7   |
| 2  |                  |      | confounders, and effect modifiers. Give diagnostic criteria, if   |     |
| 3  |                  |      | applicable                                                        |     |
| 4  |                  |      |                                                                   |     |
| 5  |                  |      |                                                                   |     |
| 6  | Data sources /   | #8   | For each variable of interest give sources of data and details of | 6-7 |
| 7  | measurement      |      | methods of assessment (measurement). Describe                     |     |
| 8  |                  |      | comparability of assessment methods if there is more than one     |     |
| 9  |                  |      | group. Give information separately for for exposed and            |     |
| 10 |                  |      | unexposed groups if applicable.                                   |     |
| 11 |                  |      |                                                                   |     |
| 12 |                  |      |                                                                   |     |
| 13 |                  |      |                                                                   |     |
| 14 | Bias             | #9   | Describe any efforts to address potential sources of bias         | 9   |
| 15 |                  |      |                                                                   |     |
| 16 |                  |      |                                                                   |     |
| 17 | Study size       | #10  | Explain how the study size was arrived at                         | 7   |
| 18 |                  |      |                                                                   |     |
| 19 | Quantitative     | #11  | Explain how quantitative variables were handled in the            | 8   |
| 20 | variables        |      | analyses. If applicable, describe which groupings were chosen,    |     |
| 21 |                  |      | and why                                                           |     |
| 22 |                  |      |                                                                   |     |
| 23 |                  |      |                                                                   |     |
| 24 | Statistical      | #12a | Describe all statistical methods, including those used to control | 9   |
| 25 | methods          |      | for confounding                                                   |     |
| 26 |                  |      |                                                                   |     |
| 27 |                  |      |                                                                   |     |
| 28 |                  | #12b | Describe any methods used to examine subgroups and                | 9   |
| 29 |                  |      | interactions                                                      |     |
| 30 |                  |      |                                                                   |     |
| 31 |                  |      |                                                                   |     |
| 32 |                  | #12c | Explain how missing data were addressed                           | 9   |
| 33 |                  |      |                                                                   |     |
| 34 |                  |      |                                                                   |     |
| 35 |                  | #12d | If applicable, describe analytical methods taking account of      | 9   |
| 36 |                  |      | sampling strategy                                                 |     |
| 37 |                  |      |                                                                   |     |
| 38 |                  |      |                                                                   |     |
| 39 |                  | #12e | Describe any sensitivity analyses                                 | 9   |
| 40 |                  |      |                                                                   |     |
| 41 | Participants     | #13a | Report numbers of individuals at each stage of study—eg           | 10  |
| 42 |                  |      | numbers potentially eligible, examined for eligibility, confirmed |     |
| 43 |                  |      | eligible, included in the study, completing follow-up, and        |     |
| 44 |                  |      | analysed. Give information separately for for exposed and         |     |
| 45 |                  |      | unexposed groups if applicable.                                   |     |
| 46 |                  |      |                                                                   |     |
| 47 |                  |      |                                                                   |     |
| 48 |                  |      |                                                                   |     |
| 49 |                  | #13b | Give reasons for non-participation at each stage                  | 6   |
| 50 |                  |      |                                                                   |     |
| 51 |                  |      |                                                                   |     |
| 52 |                  | #13c | Consider use of a flow diagram                                    | 6   |
| 53 |                  |      |                                                                   |     |
| 54 | Descriptive data | #14a | Give characteristics of study participants (eg demographic,       | 10  |
| 55 |                  |      | clinical, social) and information on exposures and potential      |     |
| 56 |                  |      | confounders. Give information separately for exposed and          |     |
| 57 |                  |      | unexposed groups if applicable.                                   |     |
| 58 |                  |      |                                                                   |     |
| 59 |                  |      |                                                                   |     |
| 60 |                  |      |                                                                   |     |

|    |                  |      |                                                                      |       |
|----|------------------|------|----------------------------------------------------------------------|-------|
| 1  |                  | #14b | Indicate number of participants with missing data for each           | 10    |
| 2  |                  |      | variable of interest                                                 |       |
| 3  |                  |      |                                                                      |       |
| 4  |                  |      |                                                                      |       |
| 5  | Outcome data     | #15  | Report numbers of outcome events or summary measures.                | 10    |
| 6  |                  |      | Give information separately for exposed and unexposed                |       |
| 7  |                  |      | groups if applicable.                                                |       |
| 8  |                  |      |                                                                      |       |
| 9  |                  |      |                                                                      |       |
| 10 | Main results     | #16a | Give unadjusted estimates and, if applicable, confounder-            | 10    |
| 11 |                  |      | adjusted estimates and their precision (eg, 95% confidence           |       |
| 12 |                  |      | interval). Make clear which confounders were adjusted for and        |       |
| 13 |                  |      | why they were included                                               |       |
| 14 |                  |      |                                                                      |       |
| 15 |                  |      |                                                                      |       |
| 16 |                  |      |                                                                      |       |
| 17 |                  | #16b | Report category boundaries when continuous variables were            | 10    |
| 18 |                  |      | categorized                                                          |       |
| 19 |                  |      |                                                                      |       |
| 20 |                  |      |                                                                      |       |
| 21 |                  | #16c | If relevant, consider translating estimates of relative risk into    | 10-11 |
| 22 |                  |      | absolute risk for a meaningful time period                           |       |
| 23 |                  |      |                                                                      |       |
| 24 | Other analyses   | #17  | Report other analyses done—e.g., analyses of subgroups and           | 10-11 |
| 25 |                  |      | interactions, and sensitivity analyses                               |       |
| 26 |                  |      |                                                                      |       |
| 27 |                  |      |                                                                      |       |
| 28 | Key results      | #18  | Summarise key results with reference to study objectives             | 11    |
| 29 |                  |      |                                                                      |       |
| 30 |                  |      |                                                                      |       |
| 31 | Limitations      | #19  | Discuss limitations of the study, taking into account sources of     | 13    |
| 32 |                  |      | potential bias or imprecision. Discuss both direction and            |       |
| 33 |                  |      | magnitude of any potential bias.                                     |       |
| 34 |                  |      |                                                                      |       |
| 35 |                  |      |                                                                      |       |
| 36 | Interpretation   | #20  | Give a cautious overall interpretation considering objectives,       | 14    |
| 37 |                  |      | limitations, multiplicity of analyses, results from similar studies, |       |
| 38 |                  |      | and other relevant evidence.                                         |       |
| 39 |                  |      |                                                                      |       |
| 40 |                  |      |                                                                      |       |
| 41 | Generalisability | #21  | Discuss the generalisability (external validity) of the study        | 14    |
| 42 |                  |      | results                                                              |       |
| 43 |                  |      |                                                                      |       |
| 44 |                  |      |                                                                      |       |
| 45 | Funding          | #22  | Give the source of funding and the role of the funders for the       | 16    |
| 46 |                  |      | present study and, if applicable, for the original study on which    |       |
| 47 |                  |      | the present article is based                                         |       |
| 48 |                  |      |                                                                      |       |
| 49 |                  |      |                                                                      |       |

The STROBE checklist is distributed under the terms of the Creative Commons Attribution License CC-BY. This checklist was completed on 14. May 2018 using <http://www.goodreports.org/>, a tool made by the [EQUATOR Network](#) in collaboration with [Penelope.ai](#)
