# Supplementary material for: Cross-sectional study of the association between serum perfluorinated alkyl acid concentrations and dental caries among US adolescents (NHANES 1999–2012)
Source: PubMed Central journal article supplement — BMJ Open. 2019 Feb 5;9(2):e024189. doi: 10.1136/bmjopen-2018-024189 (PMC6377528; doi:10.1136/bmjopen-2018-024189), 2019-02-05
Supplement: bmjopen-2018-024189supp001.pdf [file bmjopen-2018-024189supp001.pdf]

**Supplemental Tables:**

**Supplemental Table 1: Adjusted prevalence odds ratio of caries by perfluoroalkyl substance concentrations among age 12 to 19-year-old US adolescents (2003-2012): Sensitivity analyses adjusting for dietary sugar intake and multi-pollutant model of serum PFAA concentrations.**

| <b>PFAA</b> | <b>Adjusted Model 1<sup>a</sup></b> | <b>Adjusted-Model 2<sup>b</sup></b> | <b>Adjusted-Model 3<sup>c</sup></b> |
|-------------|-------------------------------------|-------------------------------------|-------------------------------------|
| PFOA        | 0.95 (0.87, 1.04)                   | 0.94 (0.84, 1.06)                   | 0.93 (0.83, 1.05)                   |
| PFOS        | 0.93 (0.85, 1.01)                   | 0.92 (0.85, 1.00)                   | 0.92 (0.85, 1.02)                   |
| PFNA        | 0.95 (0.85, 1.05)                   | 0.95 (0.85, 1.05)                   | 0.95 (0.85, 1.05)                   |
| PFHxS       | 0.95 (0.90, 0.99)                   | 0.96 (0.90, 1.02)                   | 0.96 (0.90, 1.02)                   |

<sup>a</sup> Adjusted for: Adolescent's Age, Gender, Race (Mexican American, other Hispanic, non-Hispanic white, non-Hispanic black, other non-Hispanic race), Education level of the parent/guardian (<12; 12; some college education), Family PIR (<1, 1-1.85, >1.85), blood lead, and serum cotinine levels.

<sup>b</sup> Adjusted for: Adolescent's Age, Gender, Race (Mexican American, other Hispanic, non-Hispanic white, non-Hispanic black, other non-Hispanic race), Education level of the parent/guardian (<12; 12; some college education), Family PIR (<1, 1-1.85, >1.85), log transformed PFOA concentration, log transformed PFOS concentration, log transformed PFNA concentration, log transformed PFHxS concentration, blood lead, and serum cotinine levels.

<sup>c</sup> Adjusted for: Dietary sugar intake, Adolescent's Age, Gender, Race (Mexican American, other Hispanic, non-Hispanic white, non-Hispanic black, other non-Hispanic race), Education level of the parent/guardian (<12; 12; some college education), Family PIR (<1, 1-1.85, >1.85), blood lead, and serum cotinine levels

**Supplemental Table 2: Sensitivity analysis of count ratios of surface level dental caries by log<sub>2</sub> transformed PFAA concentrations among age 12 to 19-year-old US adolescents (NHANES 1999-2014)**

| <b>PFAA</b> | <b>Count Ratio<sup>a</sup></b> | <b>95% CI<sup>a</sup></b> |
|-------------|--------------------------------|---------------------------|
| PFOA        | 0.990                          | 0.989-0.990               |
| PFOS        | 0.948                          | 0.947-0.948               |
| PFNA        | 0.985                          | 0.984-0.985               |
| PFHxS       | 0.974                          | 0.973-0.974               |

<sup>a</sup> Adjusted for: Adolescent's Age, Gender, Race (Mexican American, other Hispanic, non-Hispanic white, non-Hispanic black, other non-Hispanic race), Education level of the parent/guardian (<12; 12; some college education), Family PIR (<1, 1-1.85, >1.85), blood lead, and serum cotinine levels.
